# Supplementary material
Source: PubMed Central journal article supplement (PMC4187229)
Supplement: peds.2013-3937_peds.2013-3937SupplementaryData.pdf [file peds.2013-3937_peds.2013-3937SupplementaryData.pdf]

## Supplemental Information

### SUBJECTS AND METHODS

#### • Nutritional Assessment

Breastfeeding was characterized by using World Health Organization criteria.<sup>45</sup> Weight was measured to the nearest 10 g (Salter 914 electronic scale; Fairmont, MN). Recumbent length was measured to the nearest tenth of a centimeter by using a sliding scale produced locally. Birth weight was measured by hospital staff by using a different scale to the nearest 50 g.

#### • TI

Ultrasound was performed by using a Just Vision 400 with PVF-745v probe (Toshiba; Tochigi, Japan) to derive the volume-related TI.<sup>46</sup>

#### • Blood Leukocytes

Heparinized venous blood was collected at 6 and 15 weeks. A complete blood count with differential was performed on blood diluted 1:5 with EDTA-isotonic saline (Sysmex XT1800i; Diamond Diagnostics, Holliston, MA). Concentrations of naive and memory/activated CD4 and CD8 T cells were determined by using Multitest reagents, Trucount tubes, a FACSCalibur flow cytometer, and CellQuest Pro software (BD Biosciences, San Jose, CA).

#### • Vaccine-Specific T-cell SI

The flow cytometric assay of specific cell-mediated immune response in activated whole blood (FASCIA) method<sup>47–49</sup> was used to measure the SI after 6 days of culture of peripheral blood mononuclear cells at 37°C in 5% CO<sub>2</sub> in medium containing 10% heat-inactivated autologous plasma plus the T-cell mitogen SEB (Toxin Technologies, Sarasota,

FL) as a positive control, diluent as a negative control, or 1 of 4 vaccine antigens: PPD from *Mycobacterium bovis*, the organism used in the BCG vaccine (NIBSC; Potters Bar, United Kingdom); purified and inactivated polio virus types 1, 2, and 3 (Sanofi-Pasteur, Lyon, France); HBV surface antigen (adw subtype, recombinant; Fitzgerald, Acton, MA); or TT (NIBSC). Lymphoblasts were identified with forward/side scatter, memory/activated T cells by expression of CD3, CD4, CD8, and CD45RO. Dead cells were excluded by using a viability dye. Flow analysis was performed with a FACSAria III and FACS Diva software (BD Biosciences) and data analysis with FlowJo software (TreeStar, Ashland, OR) to calculate the SI as the ratio of memory/activated T-cell blasts in cultures with stimulation relative to the negative control.

#### • Antibody in Lymphocyte Supernatant Assay

The assay was performed essentially as described.<sup>50</sup> Commercial ELISA kits were used to measure IgG specific for TT (The Binding Site, San Diego, CA), polio virus (Fitzgerald), and HBV (Diasorin, Stillwater, MN) in the supernatant of peripheral blood mononuclear cells cultured for 48 hours at 37°C in 5% CO<sub>2</sub> in medium containing 10% fetal bovine serum at a density of  $1 \times 10^7$  per mL.

#### • PPD-DTH Skin-Test Response

The area of induration was measured 48 hours after intradermal injection of 0.1 mL tuberculin, a PPD from a human strain of *Mycobacterium tuberculosis* (1.0 TU; Span Diagnostics Ltd, Gujarat, India) on the flexor surface of the forearm.

#### • Characterization of Microbiota by DNA Sequence Analysis

Stool DNA was extracted by using a fecal DNA kit (Zymo Research, Irvine, CA). Mixed-template amplicons were amplified from this DNA by using the F515-R806 (V4) segment of the bacterial 16S rRNA gene modified to contain an adapter region for sequencing on the Illumina MiSEQ platform and a unique barcode sequence to enable multiplexing of up to ~1500 samples in a single sequencing run.<sup>51</sup> Raw data were demultiplexed, quality-filtered, and analyzed by using the open-source software Quantitative Insights Into Microbial Ecology (QIIME).<sup>52,53</sup> All samples produced useful data. The median number of complete V4 sequence reads per sample was 37 883 with only 1 sample <15 000. Operational taxonomic units were assigned by using the QIIME implementation of UCLUST<sup>54</sup> and a threshold of 97% pairwise identity.

#### • Identification of *Bifidobacterium* Species

A *Bifidobacterium*-specific T-RFLP assay was performed as described.<sup>44</sup> Briefly, DNA was amplified by PCR by using primers NBIF-F and NBIF-R (Supplemental Table 4), purified and cut with restriction enzymes AluI and HaeIII, fragment sizes were determined on an ABI 3100 analyzer (Applied Biosystems, Carlsbad, CA) for comparison with expected sizes. The results used are for the HaeIII fragments, which are consistent with the AluI results.

#### • Differentiation of *B longum* Subspecies *infantis* and *longum*

DNA was amplified by PCR by using a mixture containing 0.5  $\mu$ L of 10  $\mu$ M

stock of each of 3 primers, FWD\_BL\_BI, REV\_BL and REV\_BI (Supplemental Table 4): 12.5  $\mu\text{L}$  GoTaq Green Master Mix (Promega, Madison, WI), 1  $\mu\text{L}$  of 25 mM  $\text{MgCl}_2$ , 1  $\mu\text{L}$  of template DNA, and 9  $\mu\text{L}$  of nuclease free water. Cycling conditions were 95°C for 2 minutes, 30 cycles of 95°C for 1 minute, 54°C for 1 minute, and 72°C for 30 seconds, followed by a 72°C extension for 5 minutes. PCR products were purified by using the QIAquick PCR purification kit (Qiagen, Valencia, CA) and diluted 1:10 for analysis (1.5  $\mu\text{L}$ ) by capillary electrophoresis on an ABI 3100 genetic analyzer. The HEX fluorophore on the primer common to both subspecies allowed detection and differentiation of the amplicon sizes unique to *B longum* subspecies *longum* and *B longum* subspecies *infantis*, and an approximate quantification of the abundance of each amplicon based on peak area. The samples were analyzed with PeakScanner 1.0 software (Applied Biosyste).

#### • Quantification of *Bifidobacterium* by PCR

Total bacteria and *Bifidobacterium* 16S rDNA copy number per gram of stool

were measured by qPCR. SYBR green and TaqMan qPCR assays were performed on a 7500 Fast Real-Time PCR system (Applied Biosystems) with primers specific for bacteria and the genus *Bifidobacterium* (Supplemental Table 4). Universal Bacteria SYBR green assays contained 10  $\mu\text{L}$  2 $\times$ Takara SYBR Premix Ex TaqII master mix (Clontech, Mountain View, CA), 6  $\mu\text{L}$  water, 200 nM forward and reverse primers (Uni334F and Uni514R), and 1  $\mu\text{L}$  genomic DNA. Each *Bifidobacterium*-specific TaqMan assay contained 10  $\mu\text{L}$  2 $\times$ TaqMan Universal PCR master mix (Applied Biosystems), 3.75  $\mu\text{L}$  water, 300 nM forward and reverse primers (Bif F and Bif R), 150 nM *Bifidobacterium*-specific probe (Bif P), and 2.5  $\mu\text{L}$  genomic DNA. Cycling conditions and primer sequences are described in Supplemental Table 4. Each sample was assayed in triplicate with a nontemplate control for each plate.

## RESULTS

### • Vaccine Responses at 15 Weeks

All 4 vaccines stimulate T-cell responses, with CD4 T-cells being important

for all of the vaccines and CD8 responses also being expected for OPV and BCG vaccines. Responses to the BCG and TT vaccines were higher than responses to OPV and HBV (Supplemental Fig 9). The OPV responses were low overall but positive ( $>1.0$  SI) in 44% (18 of 41) of subjects. Vaccine-specific IgG responses were also assessed for OPV, TT, and HBV, whereas the DTH skin-test response to PPD antigen was used to evaluate the BCG response. The median (interquartile range) OPV-IgG response was 1402 (500) mIU/mL (range: 1105–4759 mIU/mL;  $n = 44$ ). The median TT-IgG response was 198 (422) mIU/mL (range: 7–2540 mIU/mL;  $n = 46$ ). The median HBV-IgG response was very low at 3.7 (0.5) mIU/mL (range: 3.0 – 4.6 mIU/mL;  $n = 29$ ). The median area of induration for the PPD-DTH skin-test response was 0.709 (0.831)  $\text{cm}^2$  (range: 0–2.54  $\text{cm}^2$  with 4 “0” values;  $n = 47$ ). Associations of vaccine responses with microbiota abundance assessed by using the 16S rRNA gene sequence data are summarized in Supplemental Figs 10 and 11.

## SUPPLEMENTAL REFERENCES

45. WHO/UNICEF. *Indicators for Assessing Infant and Young Child Practices*. Geneva, Switzerland: World Health Organization; 2008
46. Hasselbalch H, Nielsen MB, Jeppesen D, Pedersen JF, Karkov J. Sonographic measurement of the thymus in infants. *Eur Radiol*. 1996;6(5):700–703
47. Gaines H, Andersson L, Biberfeld G. A new method for measuring lymphoproliferation at the single-cell level in whole blood cultures by flow cytometry. *J Immunol Methods*. 1996;195(1–2):63–72
48. Svahn A, Linde A, Thorstensson R, Karlén K, Andersson L, Gaines H. Development and evaluation of a flow-cytometric assay of specific cell-mediated immune response in activated whole blood for the detection of cell-mediated immunity against varicella-zoster virus. *J Immunol Methods*. 2003;277(1–2):17–25
49. Weil AA, Arifuzzaman M, Bhuiyan TR, et al. Memory T-cell responses to *Vibrio cholerae* O1 infection. *Infect Immun*. 2009;77(11):5090–5096
50. Raqib R, Mondal D, Karim MA, et al. Detection of antibodies secreted from circulating *Mycobacterium tuberculosis*-specific plasma cells in the diagnosis of pediatric tuberculosis. *Clin Vaccine Immunol*. 2009;16(4):521–527
51. Caporaso JG, Lauber CL, Walters WA, et al. Global patterns of 16S rRNA diversity at a depth of millions of sequences per sample. *Proc Natl Acad Sci USA*. 2011;108(suppl 1):4516–4522
52. Caporaso JG, Kuczynski J, Stombaugh J, et al. QIIME allows analysis of high-throughput community sequencing data. *Nat Methods*. 2010;7(5):335–336
53. Kuczynski J, Stombaugh J, Walters WA, González A, Caporaso JG, Knight R. Using QIIME to analyze 16S rRNA gene sequences from microbial communities. *Curr Protoc Bioinformatics*. 2011 Dec;Chapter 10:Unit 10.7. doi: 10.1002/0471250953.bi1007s36
54. Bokulich NA, Subramanian S, Faith JJ, et al. Quality-filtering vastly improves diversity estimates from Illumina amplicon sequencing. *Nat Methods*. 2013;10(1):57–59
55. Hartman AL, Lough DM, Barupal DK, Fiehn O, Fishbein T, Zasloff M, Eisen JA. Human gut microbiome adopts an alternative state following small bowel transplantation. *Proceedings of the National Academy of Sciences of the United States of America*, 106:40 (2009) 17187–17192
56. Penders J, Vink C, Driessen C, London N, Thijs C, Stobberingh EE. Quantification of *Bifidobacterium* spp., *Escherichia coli* and *Clostridium difficile* in faecal samples of breast-fed and formula-fed infants by real-time PCR. *FEMS Microbiology Letters*, 243:1 (2005) 141–147

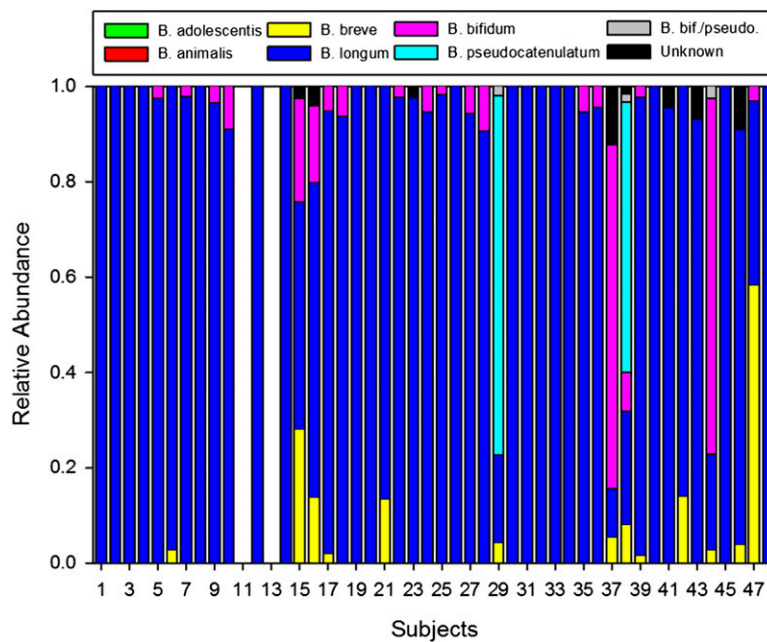**SUPPLEMENTAL FIGURE 8**

Relative abundance of different *Bifidobacterium* species at 15 weeks of age in 46 infant stool samples assessed by T-RFLP (*Hae*) analysis. Subject numbers are the same as in Fig 1. No data were available for subjects 11 and 13. No samples were positive for *Bifidobacterium animalis* or *Bifidobacterium adolescentis*.

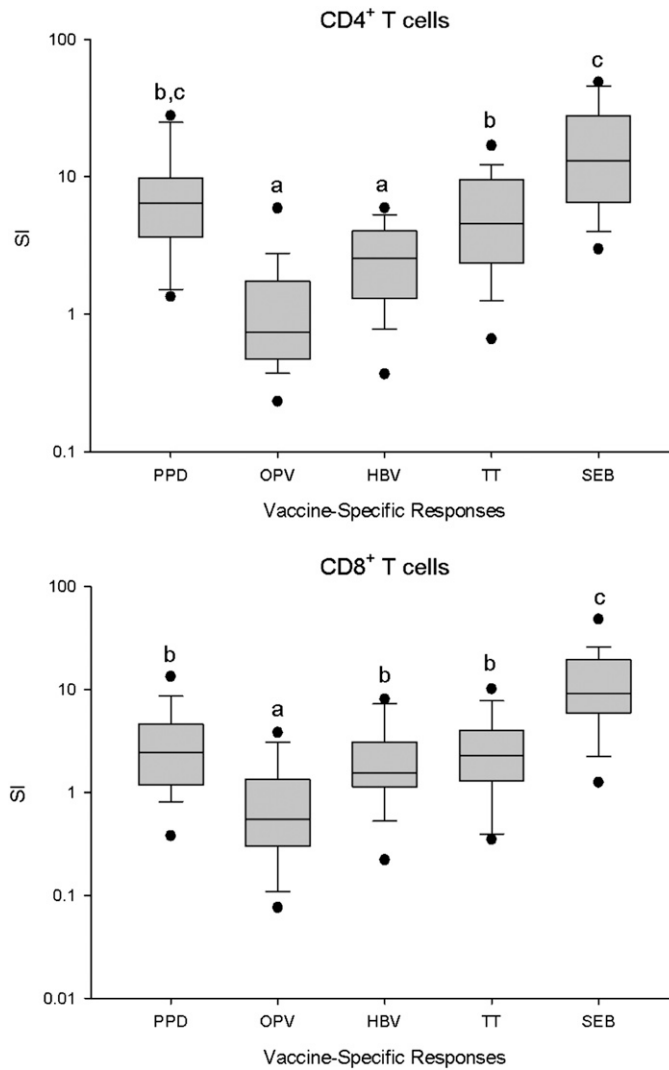

**SUPPLEMENTAL FIGURE 9**

SI of peripheral blood CD4<sup>+</sup> and CD8<sup>+</sup> T cells to vaccine antigens in infants at 15 weeks of age. The SI is shown in box plots (indicating the 5th, 10th, 25th, 50th, 75th, 90th, and 95th percentiles) for the BCG tuberculosis vaccine using PPD antigen to induce proliferation, the OPV vaccine, the HBV vaccine, the TT vaccine, and the positive control for polyclonal T-cell proliferation, SEB. Group responses without the same superscript letter superscript are significantly different ( $P < .05$ ) from one another by using Kruskal-Wallis 1-way ANOVA of ranks and Dunn's method for all pairwise multiple comparisons. One subject (number 47) received antibiotics at 2 weeks of age.

| Phylum         | OPV |   |   |   | Class           | PPD |   |   |                 | Order             | TT |   |   |                 | Family             | HBV                 |                    |                  |                  | Genus           | SEB          |                 |   |        |   |   |  |
|----------------|-----|---|---|---|-----------------|-----|---|---|-----------------|-------------------|----|---|---|-----------------|--------------------|---------------------|--------------------|------------------|------------------|-----------------|--------------|-----------------|---|--------|---|---|--|
|                | P   | P | T | V |                 | P   | P | T | V               |                   | P  | P | T | S               |                    | P                   | P                  | T                | B                |                 | P            | P               | T | S      |   |   |  |
| Actinobacteria | ■   | ■ | ■ | ■ | Actinobacteria  | ■   | ■ | ■ | ■               | Actinomycetales   | ■  | ■ | ■ | ■               | Actinomycetaceae   |                     |                    |                  |                  | Actinomyces     |              |                 |   |        |   |   |  |
|                |     |   |   |   |                 |     |   |   |                 |                   |    |   |   |                 | Corynebacteriaceae |                     |                    |                  | ■                | Corynebacterium |              |                 | ■ |        |   |   |  |
|                |     |   |   |   |                 |     |   |   |                 |                   |    |   |   |                 | Micrococcaceae     |                     |                    |                  |                  | Rothia          |              |                 |   |        |   |   |  |
|                |     |   |   |   |                 |     |   |   |                 |                   |    |   |   | ■               | ■                  | ■                   | Bifidobacteriaceae |                  |                  |                 | ■            | Bifidobacterium |   |        | ■ | ■ |  |
|                |     |   |   |   |                 |     |   |   |                 |                   |    |   |   | ■               | ■                  | ■                   | Coriobacteriaceae  |                  |                  |                 | ■            | Collinsella     |   |        |   | ■ |  |
| Bacteroidetes  |     |   |   |   | Bacteroidia     |     |   |   |                 | Bacteroidales     |    |   |   |                 | Bacteroidaceae     |                     |                    |                  |                  | Bacteroides     |              |                 |   |        |   |   |  |
|                |     |   |   |   |                 |     |   |   |                 |                   |    |   |   |                 | Porphyromonadaceae |                     |                    |                  | ■                | Parabacteroides |              |                 |   |        |   |   |  |
|                |     |   |   |   |                 |     |   |   |                 |                   |    |   |   |                 | Prevotellaceae     |                     |                    |                  |                  | Prevotella      |              |                 |   |        |   |   |  |
| Firmicutes     |     | ■ | ■ | ■ | Bacilli         |     |   |   | ■               | Bacillales        |    |   |   |                 | Staphylococcaceae  |                     |                    |                  |                  | Gemella         |              |                 |   |        |   |   |  |
|                |     |   |   |   |                 |     |   |   |                 |                   |    |   |   |                 |                    |                     |                    |                  | Staphylococcus   |                 |              |                 |   |        |   |   |  |
|                |     |   |   |   |                 |     |   |   |                 |                   |    |   |   |                 |                    |                     |                    | ■                | Dolosigranulum   |                 |              | ■               |   |        |   |   |  |
|                |     |   |   |   |                 |     |   |   |                 |                   |    |   |   |                 | ■                  |                     |                    |                  | Enterococcaceae  |                 |              | ■               | ■ |        |   |   |  |
|                |     |   |   |   |                 |     |   |   |                 |                   |    |   |   |                 |                    |                     |                    | ■                | Lactobacillaceae |                 |              | ■               | ■ |        |   |   |  |
|                |     |   |   |   |                 |     |   |   |                 |                   |    |   |   |                 |                    |                     |                    | Streptococcaceae |                  |                 |              | ■               |   |        |   |   |  |
|                |     |   |   |   |                 |     |   |   |                 |                   |    |   |   |                 |                    |                     |                    |                  |                  |                 | ■            |                 |   |        |   |   |  |
|                |     |   |   |   |                 |     |   |   |                 |                   |    |   |   |                 |                    |                     |                    | Streptococcus    |                  |                 | ■            | ■               |   |        |   |   |  |
|                |     |   |   |   |                 |     |   |   |                 |                   |    |   |   |                 |                    |                     |                    | Clostridiaceae   |                  |                 |              | ■               |   |        |   |   |  |
|                |     |   |   |   |                 |     |   |   |                 |                   |    |   | ■ | ■               | ■                  | XI (Incertae Sedis) |                    |                  |                  |                 | Anaerococcus |                 |   |        |   |   |  |
| Proteobacteria |     |   |   |   | αProteobacteria |     |   |   |                 | (none)            |    |   |   |                 | (none)             |                     |                    |                  |                  | (none)          |              |                 |   |        |   |   |  |
|                |     |   |   |   | βProteobacteria | ■   | ■ | ■ | ■               | Burkholderiales   |    |   |   | ■               | (none)             |                     |                    |                  |                  | (none)          |              |                 |   |        |   |   |  |
|                |     |   |   |   | εProteobacteria |     |   |   |                 | Campylobacterales |    |   |   |                 | Campylobacteraceae |                     |                    |                  |                  | Campylobacter   |              |                 |   |        |   |   |  |
|                |     |   |   |   | γProteobacteria |     |   |   | ■               | Enterobacteriales |    |   |   | ■               | Enterobacteriaceae |                     |                    |                  | ■                | Esch./Shigella  |              |                 | ■ | ■      |   |   |  |
|                |     |   |   |   |                 |     |   |   | Pasteurellales  |                   |    |   |   | Pasteurellaceae |                    |                     |                    |                  | (none)           |                 |              |                 |   |        |   |   |  |
|                |     |   |   |   |                 |     |   |   | Pseudomonadales | ■                 | ■  | ■ | ■ | ■               | ■                  | ■                   | ■                  | ■                | ■                | Acinetobacter   |              |                 | ■ | ■      |   |   |  |
|                |     |   |   |   |                 |     |   |   |                 |                   |    |   |   |                 |                    |                     |                    |                  | Pseudomonadaceae | ■               | ■            |                 |   | (none) |   |   |  |

**SUPPLEMENTAL FIGURE 10**

Heat map showing positive (dark blue rectangles) and negative (light orange rectangles) associations of microbiota relative abundance (at the phylum, class, order, family, and genus levels) with T-cell proliferation responses (SI) to the indicated vaccines (OPV, PPD to assess response to the BCG vaccine against tuberculosis, TT, HBV, and the polyclonal T-cell stimulant SEB). Significant ( $P < .05$ ) associations were characterized as positive or negative by using Spearman correlation analysis of continuous data (T-cell SI and relative abundance of microbiota) and the Wilcoxon test to compare relative abundance of microbiota in “high” and “low” vaccine responders (those above or below the median T-cell SI response of interest) as described in Methods. Both CD4 and CD8 responses were analyzed for OPV, PPD, and SEB, whereas only CD4 responses were considered for TT and HBV. Median microbiota relative abundance for vaccine high and low responders for CD4 and CD8 are shown in Supplemental Figs 11 and 12. Esch., *Escherichia*.

| Taxa                           | Group | OPV Vaccine |         |         | Tuberculosis Vaccine |         |         | TT Vaccine |         |         | HBV   |         |         | Positive Control (SEB) |         |         |
|--------------------------------|-------|-------------|---------|---------|----------------------|---------|---------|------------|---------|---------|-------|---------|---------|------------------------|---------|---------|
|                                |       | Ratio       | Median  | IQR     | Ratio                | Median  | IQR     | Ratio      | Median  | IQR     | Ratio | Median  | IQR     | Ratio                  | Median  | IQR     |
| <b>Phylum</b>                  |       |             |         |         |                      |         |         |            |         |         |       |         |         |                        |         |         |
| <i>Actinobacteria (A)</i>      | above | 1.18        | 8.6E-01 | 1.7E-01 | 1.19                 | 8.7E-01 | 1.7E-01 | 1.25       | 8.6E-01 | 1.1E-01 | 1.07  | 8.3E-01 | 3.6E-01 | 1.18                   | 8.6E-01 | 1.7E-01 |
|                                | below |             | 7.3E-01 | 4.8E-01 |                      | 7.3E-01 | 3.4E-01 |            | 6.8E-01 | 3.8E-01 |       | 7.8E-01 | 4.1E-01 |                        | 7.3E-01 | 4.5E-01 |
| <i>Bacteroidetes (B)</i>       | above | 2.65        | 5.5E-04 | 6.4E-03 | 0.16                 | 1.8E-04 | 4.3E-03 | 0.11       | 2.0E-04 | 8.7E-04 | 0.26  | 2.3E-04 | 3.3E-03 | 0.63                   | 2.9E-04 | 8.4E-03 |
|                                | below |             | 2.1E-04 | 2.3E-03 |                      | 1.1E-03 | 9.2E-03 |            | 1.8E-03 | 9.7E-03 |       | 8.9E-04 | 9.6E-03 |                        | 4.6E-04 | 3.9E-03 |
| <i>Firmicutes (F)</i>          | above | 0.67        | 8.5E-02 | 7.4E-02 | 0.57                 | 8.0E-02 | 5.8E-02 | 0.58       | 8.3E-02 | 5.2E-02 | 0.96  | 9.3E-02 | 9.3E-02 | 0.55                   | 7.6E-02 | 5.7E-02 |
|                                | below |             | 1.3E-01 | 1.8E-01 |                      | 1.4E-01 | 1.6E-01 |            | 1.4E-01 | 2.6E-01 |       | 9.7E-02 | 1.6E-01 |                        | 1.4E-01 | 1.4E-01 |
| <i>Proteobacteria (P)</i>      | above | 0.47        | 2.8E-02 | 1.3E-01 | 0.37                 | 2.1E-02 | 1.6E-01 | 0.30       | 2.1E-02 | 9.2E-02 | 0.55  | 3.2E-02 | 1.7E-01 | 0.37                   | 2.1E-02 | 1.4E-01 |
|                                | below |             | 5.8E-02 | 1.4E-01 |                      | 5.8E-02 | 1.2E-01 |            | 6.8E-02 | 1.5E-01 |       | 5.8E-02 | 1.4E-01 |                        | 5.8E-02 | 1.3E-01 |
| <b>Class</b>                   |       |             |         |         |                      |         |         |            |         |         |       |         |         |                        |         |         |
| <i>A-Actinobacteria</i>        | above | 1.18        | 8.6E-01 | 1.7E-01 | 1.19                 | 8.7E-01 | 1.7E-01 | 1.25       | 8.6E-01 | 1.1E-01 | 1.07  | 8.3E-01 | 3.6E-01 | 1.18                   | 8.6E-01 | 1.7E-01 |
|                                | below |             | 7.3E-01 | 4.8E-01 |                      | 7.3E-01 | 3.4E-01 |            | 6.8E-01 | 3.8E-01 |       | 7.8E-01 | 4.1E-01 |                        | 7.3E-01 | 4.5E-01 |
| <i>B-Bacteroidia</i>           | above | 2.65        | 5.5E-04 | 6.4E-03 | 0.15                 | 1.7E-04 | 4.3E-03 | 0.10       | 1.8E-04 | 8.7E-04 | 0.26  | 2.3E-04 | 3.3E-03 | 0.62                   | 2.9E-04 | 8.4E-03 |
|                                | below |             | 2.1E-04 | 2.3E-03 |                      | 1.1E-03 | 9.2E-03 |            | 1.7E-03 | 9.6E-03 |       | 8.9E-04 | 9.6E-03 |                        | 4.6E-04 | 3.9E-03 |
| <i>F-Bacilli</i>               | above | 0.79        | 7.0E-02 | 5.9E-02 | 0.70                 | 7.6E-02 | 5.3E-02 | 0.68       | 7.7E-02 | 4.2E-02 | 0.98  | 8.0E-02 | 9.0E-02 | 0.64                   | 6.9E-02 | 5.8E-02 |
|                                | below |             | 8.9E-02 | 1.4E-01 |                      | 1.1E-01 | 1.4E-01 |            | 1.1E-01 | 2.5E-01 |       | 8.1E-02 | 1.3E-01 |                        | 1.1E-01 | 1.5E-01 |
| <i>F-Clostridia</i>            | above | 1.01        | 3.5E-03 | 1.1E-02 | 0.29                 | 1.9E-03 | 4.8E-03 | 0.25       | 1.5E-03 | 7.7E-03 | 0.40  | 2.2E-03 | 5.4E-03 | 0.55                   | 2.4E-03 | 1.2E-02 |
|                                | below |             | 3.5E-03 | 1.8E-02 |                      | 6.6E-03 | 2.2E-02 |            | 6.1E-03 | 2.1E-02 |       | 5.5E-03 | 2.3E-02 |                        | 4.4E-03 | 2.2E-02 |
| <i>P-Alphaproteobacteria</i>   | above | -           | 0.0E+00 | 1.5E-05 | -                    | 0.0E+00 | 1.4E-05 | -          | 0.0E+00 | 1.5E-05 | -     | 0.0E+00 | 1.4E-05 | -                      | 0.0E+00 | 1.4E-05 |
|                                | below |             | 0.0E+00 | 1.6E-05 |                      | 0.0E+00 | 2.1E-05 |            | 0.0E+00 | 2.1E-05 |       | 0.0E+00 | 2.1E-05 |                        | 0.0E+00 | 2.1E-05 |
| <i>P-Betaproteobacteria</i>    | above | -           | 0.0E+00 | 2.3E-05 | -                    | 0.0E+00 | 4.0E-05 | -          | 0.0E+00 | 1.4E-05 | -     | 0.0E+00 | 2.1E-05 | -                      | 7.1E-06 | 2.3E-05 |
|                                | below |             | 0.0E+00 | 1.5E-05 |                      | 0.0E+00 | 0.0E+00 |            | 0.0E+00 | 1.8E-05 |       | 0.0E+00 | 0.0E+00 |                        | 0.0E+00 | 0.0E+00 |
| <i>P-Epsilonproteobacteria</i> | above | -           | 0.0E+00 | 4.1E-05 | -                    | 0.0E+00 | 2.4E-05 | -          | 0.0E+00 | 2.9E-05 | -     | 0.0E+00 | 2.4E-05 | -                      | 0.0E+00 | 2.8E-05 |
|                                | below |             | 0.0E+00 | 2.6E-05 |                      | 0.0E+00 | 3.9E-05 |            | 0.0E+00 | 3.5E-05 |       | 0.0E+00 | 7.6E-05 |                        | 0.0E+00 | 3.1E-05 |
| <i>P-Gammaproteobacteria</i>   | above | 0.47        | 2.8E-02 | 1.0E-01 | 0.27                 | 1.6E-02 | 1.1E-01 | 0.24       | 1.6E-02 | 6.2E-02 | 0.47  | 2.8E-02 | 1.7E-01 | 0.37                   | 2.1E-02 | 6.6E-02 |
|                                | below |             | 5.8E-02 | 1.4E-01 |                      | 5.8E-02 | 1.2E-01 |            | 6.7E-02 | 1.5E-01 |       | 5.8E-02 | 1.2E-01 |                        | 5.8E-02 | 1.4E-01 |
| <b>Order</b>                   |       |             |         |         |                      |         |         |            |         |         |       |         |         |                        |         |         |
| <i>A-Actinomycetales</i>       | above | 0.47        | 1.5E-03 | 3.7E-03 | 1.02                 | 1.8E-03 | 3.4E-03 | 1.80       | 2.7E-03 | 3.4E-03 | 0.62  | 1.6E-03 | 3.4E-03 | 1.60                   | 2.7E-03 | 3.0E-03 |
|                                | below |             | 3.3E-03 | 3.5E-03 |                      | 1.8E-03 | 3.8E-03 |            | 1.5E-03 | 3.7E-03 |       | 2.6E-03 | 4.1E-03 |                        | 1.7E-03 | 3.9E-03 |
| <i>A-Bifidobacteriales</i>     | above | 1.17        | 8.4E-01 | 1.7E-01 | 1.18                 | 8.5E-01 | 1.6E-01 | 1.25       | 8.5E-01 | 1.4E-01 | 1.08  | 8.2E-01 | 3.4E-01 | 1.18                   | 8.5E-01 | 1.8E-01 |
|                                | below |             | 7.2E-01 | 4.7E-01 |                      | 7.2E-01 | 4.2E-01 |            | 6.8E-01 | 4.3E-01 |       | 7.6E-01 | 4.1E-01 |                        | 7.2E-01 | 4.4E-01 |
| <i>A-Coriobacteriales</i>      | above | -           | 1.8E-04 | 1.8E-02 | 3.23                 | 5.4E-05 | 3.7E-04 | 0.81       | 3.2E-05 | 1.8E-04 | 11.02 | 9.3E-05 | 7.3E-03 | 0.14                   | 8.4E-06 | 3.7E-04 |
|                                | below |             | 0.0E+00 | 6.2E-05 |                      | 1.7E-05 | 5.2E-03 |            | 4.0E-05 | 4.6E-03 |       | 8.4E-06 | 3.0E-03 |                        | 6.2E-05 | 5.2E-03 |
| <i>B-Bacteroidales</i>         | above | 2.65        | 5.5E-04 | 6.4E-03 | 0.15                 | 1.7E-04 | 4.3E-03 | 0.10       | 1.8E-04 | 8.7E-04 | 0.26  | 2.3E-04 | 3.3E-03 | 0.62                   | 2.9E-04 | 8.4E-03 |
|                                | below |             | 2.1E-04 | 2.3E-03 |                      | 1.1E-03 | 9.2E-03 |            | 1.7E-03 | 9.6E-03 |       | 8.9E-04 | 9.6E-03 |                        | 4.6E-04 | 3.9E-03 |
| <i>F-Bacillales</i>            | above | 1.15        | 5.4E-04 | 1.1E-03 | 1.07                 | 5.2E-04 | 1.0E-03 | 1.61       | 6.4E-04 | 8.3E-04 | 1.31  | 5.8E-04 | 1.1E-03 | 0.86                   | 4.2E-04 | 6.4E-04 |
|                                | below |             | 4.7E-04 | 6.6E-04 |                      | 4.9E-04 | 6.9E-04 |            | 4.0E-04 | 1.2E-03 |       | 4.4E-04 | 6.4E-04 |                        | 4.9E-04 | 1.2E-03 |

### SUPPLEMENTAL FIGURE 11

Relative abundance of stool bacteria in infants above and below median vaccine responses (CD4 T-cell SI). Positive and negative associations are highlighted in blue and orange, respectively; statistical analysis is described in the legend to Supplemental Figure 10. Esch., *Escherichia*; IQR, interquartile range.

|                              |       |      |         |         |      |         |         |      |         |         |       |         |         |      |         |         |
|------------------------------|-------|------|---------|---------|------|---------|---------|------|---------|---------|-------|---------|---------|------|---------|---------|
| <i>F-Lactobacillales</i>     | above | 0.77 | 6.6E-02 | 5.6E-02 | 0.70 | 7.4E-02 | 5.0E-02 | 0.73 | 7.5E-02 | 4.1E-02 | 0.99  | 7.8E-02 | 8.6E-02 | 0.63 | 6.6E-02 | 5.6E-02 |
|                              | below |      | 8.6E-02 | 1.4E-01 |      | 1.0E-01 | 1.4E-01 |      | 1.0E-01 | 2.5E-01 |       | 7.9E-02 | 1.3E-01 |      | 1.0E-01 | 1.6E-01 |
| <i>F-Clostridiales</i>       | above | 1.01 | 3.5E-03 | 1.1E-02 | 0.29 | 1.9E-03 | 4.8E-03 | 0.25 | 1.5E-03 | 7.7E-03 | 0.40  | 2.2E-03 | 5.4E-03 | 0.55 | 2.4E-03 | 1.2E-02 |
|                              | below |      | 3.5E-03 | 1.7E-02 |      | 6.6E-03 | 2.2E-02 |      | 6.1E-03 | 2.1E-02 |       | 5.5E-03 | 2.3E-02 |      | 4.4E-03 | 2.2E-02 |
| <i>P-Burkholderiales</i>     | above | -    | 0.0E+00 | 2.3E-05 | -    | 0.0E+00 | 4.0E-05 | -    | 0.0E+00 | 1.4E-05 | -     | 0.0E+00 | 1.9E-05 | -    | 0.0E+00 | 2.3E-05 |
|                              | below |      | 0.0E+00 | 0.0E+00 |      | 0.0E+00 | 0.0E+00 |      | 0.0E+00 | 8.4E-06 |       | 0.0E+00 | 0.0E+00 |      | 0.0E+00 | 0.0E+00 |
| <i>P-Campylobacteriales</i>  | above | -    | 0.0E+00 | 4.1E-05 | -    | 0.0E+00 | 2.4E-05 | -    | 0.0E+00 | 2.9E-05 | -     | 0.0E+00 | 2.4E-05 | -    | 0.0E+00 | 2.8E-05 |
|                              | below |      | 0.0E+00 | 2.6E-05 |      | 0.0E+00 | 3.9E-05 |      | 0.0E+00 | 3.5E-05 |       | 0.0E+00 | 7.6E-05 |      | 0.0E+00 | 3.1E-05 |
| <i>P-Enterobacteriales</i>   | above | 0.47 | 2.6E-02 | 9.5E-02 | 0.27 | 1.5E-02 | 1.0E-01 | 0.24 | 1.5E-02 | 5.9E-02 | 0.47  | 2.6E-02 | 1.6E-01 | 0.36 | 2.0E-02 | 6.2E-02 |
|                              | below |      | 5.6E-02 | 1.3E-01 |      | 5.6E-02 | 1.1E-01 |      | 6.2E-02 | 1.4E-01 |       | 5.6E-02 | 1.1E-01 |      | 5.6E-02 | 1.4E-01 |
| <i>P-Pasteurellales</i>      | above | -    | 0.0E+00 | 0.0E+00 | -    | 0.0E+00 | 2.7E-05 | -    | 0.0E+00 | 3.6E-05 | -     | 0.0E+00 | 0.0E+00 | -    | 0.0E+00 | 3.6E-05 |
|                              | below |      | 0.0E+00 | 2.2E-05 |      | 0.0E+00 | 0.0E+00 |      | 0.0E+00 | 0.0E+00 |       | 0.0E+00 | 6.2E-05 |      | 0.0E+00 | 0.0E+00 |
| <i>P-Pseudomonadales</i>     | above | 0.43 | 4.4E-05 | 5.8E-05 | 0.59 | 4.8E-05 | 7.2E-05 | 0.40 | 4.9E-05 | 4.2E-05 | 0.46  | 4.5E-05 | 4.8E-05 | 0.45 | 4.6E-05 | 3.4E-05 |
|                              | below |      | 1.0E-04 | 2.1E-04 |      | 8.1E-05 | 2.2E-04 |      | 1.2E-04 | 4.0E-04 |       | 9.7E-05 | 2.7E-04 |      | 1.0E-04 | 2.2E-04 |
| <b>Family</b>                |       |      |         |         |      |         |         |      |         |         |       |         |         |      |         |         |
| <i>A-Actinomycetaceae</i>    | above | -    | 0.0E+00 | 6.0E-05 | -    | 0.0E+00 | 6.0E-05 | 0.00 | 0.0E+00 | 6.7E-05 | -     | 0.0E+00 | 4.8E-05 | -    | 0.0E+00 | 1.1E-04 |
|                              | below |      | 0.0E+00 | 5.4E-05 |      | 0.0E+00 | 5.4E-05 |      | 7.0E-06 | 6.1E-05 |       | 0.0E+00 | 9.2E-05 |      | 0.0E+00 | 4.2E-05 |
| <i>A-Corynebacteriaceae</i>  | above | 1.75 | 9.6E-05 | 1.4E-04 | 1.96 | 1.1E-04 | 1.4E-04 | 2.07 | 9.6E-05 | 1.3E-04 | 1.65  | 8.2E-05 | 1.2E-04 | 1.42 | 9.6E-05 | 1.4E-04 |
|                              | below |      | 5.5E-05 | 1.1E-04 |      | 5.5E-05 | 1.1E-04 |      | 4.6E-05 | 1.1E-04 |       | 5.0E-05 | 1.1E-04 |      | 6.7E-05 | 1.1E-04 |
| <i>A-Micrococcaceae</i>      | above | 0.55 | 1.0E-03 | 1.8E-03 | 1.01 | 1.0E-03 | 2.5E-03 | 1.34 | 1.4E-03 | 2.3E-03 | 0.82  | 1.0E-03 | 2.4E-03 | 1.44 | 1.4E-03 | 2.0E-03 |
|                              | below |      | 1.8E-03 | 2.2E-03 |      | 1.0E-03 | 2.2E-03 |      | 1.0E-03 | 2.4E-03 |       | 1.3E-03 | 2.3E-03 |      | 9.5E-04 | 2.4E-03 |
| <i>A-Bifidobacteriaceae</i>  | above | 1.17 | 8.4E-01 | 1.7E-01 | 1.18 | 8.5E-01 | 1.6E-01 | 1.25 | 8.5E-01 | 1.4E-01 | 1.08  | 8.2E-01 | 3.4E-01 | 1.18 | 8.5E-01 | 1.8E-01 |
|                              | below |      | 7.2E-01 | 4.7E-01 |      | 7.2E-01 | 4.2E-01 |      | 6.8E-01 | 4.3E-01 |       | 7.6E-01 | 4.1E-01 |      | 7.2E-01 | 4.4E-01 |
| <i>A-Coriobacteriaceae</i>   | above | -    | 1.8E-04 | 1.8E-02 | 3.22 | 5.4E-05 | 3.7E-04 | 0.81 | 3.2E-05 | 1.8E-04 | 10.99 | 9.3E-05 | 7.3E-03 | 0.14 | 8.5E-06 | 3.7E-04 |
|                              | below |      | 0.0E+00 | 6.2E-05 |      | 1.7E-05 | 5.2E-03 |      | 4.0E-05 | 4.6E-03 |       | 8.5E-06 | 3.0E-03 |      | 6.2E-05 | 5.2E-03 |
| <i>B-Bacteroidaceae</i>      | above | 0.73 | 6.0E-05 | 2.8E-03 | 0.27 | 3.0E-05 | 6.2E-04 | 0.73 | 5.7E-05 | 7.3E-04 | 0.21  | 3.8E-05 | 5.3E-04 | 0.34 | 2.8E-05 | 2.8E-03 |
|                              | below |      | 8.1E-05 | 8.3E-04 |      | 1.1E-04 | 1.5E-03 |      | 7.8E-05 | 2.2E-03 |       | 1.8E-04 | 2.2E-03 |      | 8.2E-05 | 6.3E-04 |
| <i>B-Porphyrromonadaceae</i> | above | 0.00 | 0.0E+00 | 1.9E-04 | 0.00 | 0.0E+00 | 6.3E-05 | -    | 8.3E-06 | 6.5E-05 | 0.00  | 0.0E+00 | 4.9E-05 | -    | 1.0E-05 | 1.9E-04 |
|                              | below |      | 1.4E-05 | 3.8E-05 |      | 1.4E-05 | 5.6E-05 |      | 0.0E+00 | 4.7E-05 |       | 1.5E-05 | 7.8E-05 |      | 0.0E+00 | 3.8E-05 |
| <i>B-Prevotellaceae</i>      | above | -    | 0.0E+00 | 4.4E-05 | -    | 0.0E+00 | 0.0E+00 | -    | 0.0E+00 | 0.0E+00 | -     | 0.0E+00 | 2.4E-05 | -    | 0.0E+00 | 3.8E-05 |
|                              | below |      | 0.0E+00 | 1.3E-05 |      | 0.0E+00 | 3.6E-05 |      | 0.0E+00 | 8.3E-05 |       | 0.0E+00 | 2.5E-05 |      | 0.0E+00 | 0.0E+00 |
| <i>F-Staphylococcaceae</i>   | above | 1.23 | 4.4E-04 | 6.7E-04 | 1.04 | 4.2E-04 | 5.9E-04 | 1.70 | 5.4E-04 | 5.3E-04 | 1.37  | 4.6E-04 | 5.7E-04 | 0.71 | 3.3E-04 | 5.0E-04 |
|                              | below |      | 3.6E-04 | 5.4E-04 |      | 4.0E-04 | 6.9E-04 |      | 3.1E-04 | 1.0E-03 |       | 3.4E-04 | 6.6E-04 |      | 4.7E-04 | 9.7E-04 |
| <i>F-Camobacteriaceae</i>    | above | 3.01 | 7.1E-05 | 1.2E-04 | 3.25 | 7.6E-05 | 1.3E-04 | 3.45 | 7.9E-05 | 1.5E-04 | 4.17  | 9.0E-05 | 1.5E-04 | 3.01 | 7.1E-05 | 1.3E-04 |
|                              | below |      | 2.3E-05 | 7.7E-05 |      | 2.3E-05 | 7.7E-05 |      | 2.3E-05 | 7.2E-05 |       | 2.2E-05 | 7.1E-05 |      | 2.3E-05 | 7.7E-05 |
| <i>F-Enterococcaceae</i>     | above | 1.58 | 4.4E-04 | 2.6E-03 | 1.90 | 4.4E-04 | 2.2E-03 | 0.87 | 2.9E-04 | 2.3E-03 | 0.97  | 3.0E-04 | 2.6E-03 | 6.21 | 1.0E-03 | 2.6E-03 |
|                              | below |      | 2.8E-04 | 1.4E-03 |      | 2.3E-04 | 2.0E-03 |      | 3.3E-04 | 1.7E-03 |       | 3.1E-04 | 1.7E-03 |      | 1.6E-04 | 7.4E-04 |
| <i>F-Lactobacillaceae</i>    | above | 0.88 | 1.4E-04 | 2.1E-03 | 0.28 | 6.3E-05 | 8.0E-04 | 0.06 | 6.3E-05 | 4.5E-04 | 0.05  | 6.3E-05 | 1.5E-04 | 0.12 | 5.3E-05 | 6.1E-04 |
|                              | below |      | 1.6E-04 | 4.7E-03 |      | 2.2E-04 | 5.2E-03 |      | 1.0E-03 | 6.7E-03 |       | 1.4E-03 | 5.1E-03 |      | 4.3E-04 | 5.1E-03 |
| <i>F-Streptococcaceae</i>    | above | 0.78 | 3.9E-02 | 4.2E-02 | 0.89 | 4.1E-02 | 4.7E-02 | 0.95 | 4.4E-02 | 3.3E-02 | 1.00  | 4.4E-02 | 4.8E-02 | 0.80 | 4.0E-02 | 4.6E-02 |
|                              | below |      | 5.0E-02 | 9.2E-02 |      | 4.6E-02 | 9.0E-02 |      | 4.6E-02 | 1.3E-01 |       | 4.4E-02 | 7.6E-02 |      | 5.0E-02 | 6.9E-02 |

## SUPPLEMENTAL FIGURE 11

Continued.

|                              |       |      |         |         |      |         |         |      |         |         |      |         |         |      |         |         |
|------------------------------|-------|------|---------|---------|------|---------|---------|------|---------|---------|------|---------|---------|------|---------|---------|
| <i>F-Clostridiaceae</i>      | above | 0.36 | 1.8E-05 | 3.8E-04 | 0.22 | 1.6E-05 | 3.8E-04 | 0.20 | 2.6E-05 | 2.9E-04 | 1.47 | 5.1E-05 | 5.8E-04 | 0.14 | 1.0E-05 | 2.9E-04 |
|                              | below |      | 4.9E-05 | 4.7E-04 |      | 7.0E-05 | 4.7E-04 |      | 1.3E-04 | 1.3E-03 |      | 3.5E-05 | 3.4E-04 |      | 7.0E-05 | 4.7E-04 |
| <i>F-XI (Incertae Sedis)</i> | above | 5.37 | 7.8E-05 | 1.3E-04 | 0.48 | 3.0E-05 | 1.0E-04 | 0.20 | 1.8E-05 | 7.6E-05 | 1.25 | 3.8E-05 | 9.8E-05 | 1.00 | 3.8E-05 | 1.7E-04 |
|                              | below |      | 1.5E-05 | 1.8E-04 |      | 6.3E-05 | 2.0E-04 |      | 9.0E-05 | 2.1E-04 |      | 3.0E-05 | 2.1E-04 |      | 3.8E-05 | 1.0E-04 |
| <i>Lachnospiraceae</i>       | above | -    | 0.0E+00 | 5.7E-05 | -    | 0.0E+00 | 1.8E-05 | -    | 6.4E-06 | 2.1E-05 | -    | 0.0E+00 | 2.4E-05 | -    | 0.0E+00 | 6.2E-05 |
|                              | below |      | 0.0E+00 | 2.1E-05 |      | 0.0E+00 | 1.3E-04 |      | 0.0E+00 | 7.8E-05 |      | 0.0E+00 | 2.1E-05 |      | 0.0E+00 | 2.1E-05 |
| <i>F-Veillonellaceae</i>     | above | 0.13 | 2.2E-04 | 1.1E-03 | 1.43 | 8.4E-04 | 1.8E-03 | 0.25 | 3.7E-04 | 1.6E-03 | 0.16 | 2.6E-04 | 1.5E-03 | 1.44 | 8.5E-04 | 4.2E-03 |
|                              | below |      | 1.7E-03 | 6.0E-03 |      | 5.9E-04 | 6.3E-03 |      | 1.5E-03 | 6.3E-03 |      | 1.6E-03 | 8.2E-03 |      | 5.9E-04 | 1.9E-03 |
| <i>P-Campylobacteraceae</i>  | above | -    | 0.0E+00 | 4.1E-05 | -    | 0.0E+00 | 2.4E-05 | -    | 0.0E+00 | 2.9E-05 | -    | 0.0E+00 | 2.4E-05 | -    | 0.0E+00 | 2.8E-05 |
|                              | below |      | 0.0E+00 | 2.6E-05 |      | 0.0E+00 | 3.9E-05 |      | 0.0E+00 | 3.5E-05 |      | 0.0E+00 | 7.6E-05 |      | 0.0E+00 | 3.1E-05 |
| <i>P-Enterobacteriaceae</i>  | above | 0.47 | 2.6E-02 | 9.5E-02 | 0.27 | 1.5E-02 | 1.0E-01 | 0.24 | 1.5E-02 | 5.9E-02 | 0.47 | 2.6E-02 | 1.6E-01 | 0.36 | 2.0E-02 | 6.2E-02 |
|                              | below |      | 1.7E-03 | 1.3E-01 |      | 5.6E-02 | 1.1E-01 |      | 6.2E-02 | 1.4E-01 |      | 5.6E-02 | 1.1E-01 |      | 5.6E-02 | 1.4E-01 |
| <i>P-Pasteurellaceae</i>     | above | -    | 0.0E+00 | 0.0E+00 | -    | 0.0E+00 | 2.7E-05 | -    | 0.0E+00 | 3.6E-05 | -    | 0.0E+00 | 0.0E+00 | -    | 0.0E+00 | 3.6E-05 |
|                              | below |      | 0.0E+00 | 2.2E-05 |      | 0.0E+00 | 0.0E+00 |      | 0.0E+00 | 0.0E+00 |      | 0.0E+00 | 6.2E-05 |      | 0.0E+00 | 0.0E+00 |
| <i>P-Moraxellaceae</i>       | above | 0.45 | 3.2E-05 | 4.8E-05 | 0.41 | 3.0E-05 | 4.4E-05 | 0.24 | 2.9E-05 | 3.1E-05 | 0.44 | 3.4E-05 | 4.1E-05 | 0.36 | 3.0E-05 | 3.1E-05 |
|                              | below |      | 7.2E-05 | 2.3E-04 |      | 7.2E-05 | 2.3E-04 |      | 1.2E-04 | 4.0E-04 |      | 7.8E-05 | 3.0E-04 |      | 8.3E-05 | 2.2E-04 |
| <i>P-Pseudomonadaceae</i>    | above | 0.00 | 0.0E+00 | 1.5E-05 | -    | 1.4E-05 | 2.2E-05 | -    | 1.5E-05 | 3.0E-05 | 0.00 | 0.0E+00 | 1.5E-05 | -    | 1.4E-05 | 2.1E-05 |
|                              | below |      | 1.4E-05 | 3.1E-05 |      | 0.0E+00 | 2.0E-05 |      | 0.0E+00 | 7.0E-06 |      | 7.0E-06 | 3.1E-05 |      | 0.0E+00 | 2.1E-05 |
| <b>Genus</b>                 |       |      |         |         |      |         |         |      |         |         |      |         |         |      |         |         |
| <i>A-Actinomyces</i>         | above | -    | 0.0E+00 | 4.5E-05 | -    | 0.0E+00 | 3.4E-05 | -    | 0.0E+00 | 3.0E-05 | -    | 0.0E+00 | 3.4E-05 | -    | 0.0E+00 | 1.0E-04 |
|                              | below |      | 0.0E+00 | 3.7E-05 |      | 0.0E+00 | 3.7E-05 |      | 0.0E+00 | 5.3E-05 |      | 0.0E+00 | 8.2E-05 |      | 0.0E+00 | 3.0E-05 |
| <i>A-Corynebacterium</i>     | above | 1.75 | 9.6E-05 | 1.5E-04 | 1.95 | 1.1E-04 | 1.4E-04 | 2.07 | 9.6E-05 | 1.4E-04 | 1.65 | 8.2E-05 | 1.2E-04 | 1.42 | 9.6E-05 | 1.4E-04 |
|                              | below |      | 5.5E-05 | 1.1E-04 |      | 5.5E-05 | 1.1E-04 |      | 4.6E-05 | 1.1E-04 |      | 5.0E-05 | 1.1E-04 |      | 6.7E-05 | 1.1E-04 |
| <i>A-Rothia</i>              | above | 0.53 | 9.3E-04 | 1.7E-03 | 0.98 | 1.0E-03 | 2.3E-03 | 1.27 | 1.3E-03 | 2.2E-03 | 0.78 | 9.4E-04 | 2.2E-03 | 1.40 | 1.3E-03 | 1.9E-03 |
|                              | below |      | 1.7E-03 | 2.2E-03 |      | 1.0E-03 | 2.2E-03 |      | 1.0E-03 | 2.4E-03 |      | 1.2E-03 | 2.3E-03 |      | 9.2E-04 | 2.4E-03 |
| <i>A-Bifidobacterium</i>     | above | 1.14 | 7.1E-01 | 1.2E-01 | 1.16 | 7.2E-01 | 1.3E-01 | 1.22 | 7.2E-01 | 9.5E-02 | 1.07 | 7.0E-01 | 2.9E-01 | 1.14 | 7.1E-01 | 1.2E-01 |
|                              | below |      | 6.2E-01 | 3.9E-01 |      | 6.2E-01 | 3.5E-01 |      | 5.9E-01 | 3.5E-01 |      | 6.5E-01 | 3.3E-01 |      | 6.2E-01 | 3.9E-01 |
| <i>A-Collinsella</i>         | above |      | 3.0E-05 | 2.5E-03 | 1.24 | 2.1E-05 | 7.6E-05 | 0.19 | 7.7E-06 | 3.5E-05 | 3.31 | 2.8E-05 | 6.0E-04 | 0.00 | 0.0E+00 | 2.8E-05 |
|                              | below |      | 0.0E+00 | 3.8E-05 |      | 1.7E-05 | 2.5E-03 |      | 4.0E-05 | 3.0E-03 |      | 8.4E-06 | 2.2E-03 |      | 3.8E-05 | 3.4E-03 |
| <i>B-Bacteroides</i>         | above | 0.73 | 6.0E-05 | 2.8E-03 | 0.27 | 3.0E-05 | 6.2E-04 | 0.73 | 5.7E-05 | 7.3E-04 | 0.21 | 3.8E-05 | 5.3E-04 | 0.34 | 2.8E-05 | 2.8E-03 |
|                              | below |      | 8.1E-05 | 8.3E-04 |      | 1.1E-04 | 1.5E-03 |      | 7.8E-05 | 2.2E-03 |      | 1.8E-04 | 2.2E-03 |      | 8.2E-05 | 6.3E-04 |
| <i>B-Parabacteroides</i>     | above | -    | 0.0E+00 | 1.8E-04 | -    | 0.0E+00 | 6.3E-05 | -    | 0.0E+00 | 6.5E-05 | -    | 0.0E+00 | 4.9E-05 | -    | 0.0E+00 | 1.8E-04 |
|                              | below |      | 0.0E+00 | 3.8E-05 |      | 0.0E+00 | 4.4E-05 |      | 0.0E+00 | 3.2E-05 |      | 0.0E+00 | 4.1E-05 |      | 0.0E+00 | 1.9E-05 |
| <i>B-Prevotella</i>          | above | -    | 0.0E+00 | 4.4E-05 | -    | 0.0E+00 | 0.0E+00 | -    | 0.0E+00 | 0.0E+00 | -    | 0.0E+00 | 9.4E-06 | -    | 0.0E+00 | 2.8E-05 |
|                              | below |      | 0.0E+00 | 1.3E-05 |      | 0.0E+00 | 3.6E-05 |      | 0.0E+00 | 3.8E-05 |      | 0.0E+00 | 2.5E-05 |      | 0.0E+00 | 0.0E+00 |
| <i>F-Gemella</i>             | above | 0.28 | 6.6E-06 | 6.0E-05 | 0.66 | 1.5E-05 | 6.9E-05 | 0.29 | 6.6E-06 | 6.3E-05 | 0.95 | 2.0E-05 | 8.4E-05 | 0.63 | 1.5E-05 | 8.3E-05 |
|                              | below |      | 2.3E-05 | 6.2E-05 |      | 2.2E-05 | 7.5E-05 |      | 2.3E-05 | 1.0E-04 |      | 2.1E-05 | 6.9E-05 |      | 2.3E-05 | 7.5E-05 |
| <i>F-Staphylococcus</i>      | above | 0.61 | 1.5E-04 | 4.4E-04 | 1.57 | 2.0E-04 | 4.8E-04 | 1.89 | 2.4E-04 | 4.6E-04 | 1.07 | 2.0E-04 | 5.8E-04 | 0.48 | 1.5E-04 | 2.4E-04 |
|                              | below |      | 2.5E-04 | 5.4E-04 |      | 1.3E-04 | 5.4E-04 |      | 1.2E-04 | 9.9E-04 |      | 1.9E-04 | 5.1E-04 |      | 3.1E-04 | 6.5E-04 |
| <i>F-Dolosigranulum</i>      | above | -    | 1.7E-05 | 5.5E-05 | -    | 3.2E-05 | 7.0E-05 | -    | 2.5E-05 | 7.0E-05 | 1.82 | 1.5E-05 | 6.2E-05 | -    | 2.0E-05 | 6.2E-05 |
|                              | below |      | 0.0E+00 | 2.9E-05 |      | 0.0E+00 | 2.0E-05 |      | 0.0E+00 | 2.1E-05 |      | 8.2E-06 | 2.4E-05 |      | 0.0E+00 | 2.6E-05 |

**SUPPLEMENTAL FIGURE 11**

Continued.



|                         |       |      |         |         |      |         |         |      |         |         |      |         |         |      |         |         |
|-------------------------|-------|------|---------|---------|------|---------|---------|------|---------|---------|------|---------|---------|------|---------|---------|
| <i>F-Enterococcus</i>   | above | 0.84 | 4.3E-05 | 1.5E-04 | 3.10 | 6.5E-05 | 1.8E-04 | 0.34 | 2.9E-05 | 1.3E-04 | 7.40 | 6.1E-05 | 3.7E-04 | 4.24 | 7.0E-05 | 4.0E-04 |
|                         | below |      | 5.1E-05 | 6.2E-04 |      | 2.1E-05 | 6.2E-04 |      | 8.5E-05 | 6.6E-04 |      | 8.2E-06 | 5.6E-04 |      | 1.6E-05 | 5.1E-04 |
| <i>F-Lactobacillus</i>  | above | 0.35 | 3.3E-05 | 3.8E-04 | 0.53 | 3.0E-05 | 3.8E-04 | 0.17 | 1.8E-05 | 1.3E-04 | 0.01 | 7.3E-06 | 7.4E-05 | 0.06 | 7.3E-06 | 1.2E-04 |
|                         | below |      | 9.3E-05 | 1.2E-03 |      | 5.6E-05 | 1.1E-03 |      | 1.0E-04 | 1.5E-03 |      | 6.4E-04 | 1.9E-03 |      | 1.2E-04 | 1.2E-03 |
| <i>F-Lactococcus</i>    | above | 0.66 | 1.4E-04 | 8.6E-05 | 0.75 | 1.6E-04 | 9.2E-05 | 0.78 | 1.7E-04 | 7.4E-05 | 0.90 | 1.7E-04 | 9.1E-05 | 0.74 | 1.6E-04 | 9.4E-05 |
|                         | below |      | 2.2E-04 | 2.1E-04 |      | 2.1E-04 | 1.8E-04 |      | 2.2E-04 | 2.2E-04 |      | 1.9E-04 | 2.1E-04 |      | 2.1E-04 | 1.5E-04 |
| <i>F-Streptococcus</i>  | above | 0.82 | 3.6E-02 | 4.0E-02 | 0.98 | 3.7E-02 | 4.4E-02 | 0.89 | 3.8E-02 | 3.9E-02 | 1.08 | 4.1E-02 | 4.6E-02 | 0.53 | 2.5E-02 | 3.8E-02 |
|                         | below |      | 4.4E-02 | 6.1E-02 |      | 3.8E-02 | 6.0E-02 |      | 4.2E-02 | 1.2E-01 |      | 3.8E-02 | 4.8E-02 |      | 4.7E-02 | 5.4E-02 |
| <i>F-Clostridium</i>    | above | 0.00 | 0.0E+00 | 1.4E-04 | -    | 0.0E+00 | 1.8E-04 | -    | 7.7E-06 | 2.0E-04 | -    | 7.5E-06 | 2.0E-04 | 0.00 | 0.0E+00 | 8.5E-05 |
|                         | below |      | 1.5E-05 | 5.5E-05 |      | 0.0E+00 | 5.5E-05 |      | 0.0E+00 | 4.8E-05 |      | 0.0E+00 | 4.8E-05 |      | 1.5E-05 | 1.7E-04 |
| <i>F-Anaerococcus</i>   | above | -    | 3.0E-05 | 8.2E-05 | 0.39 | 7.1E-06 | 4.6E-05 | 0.00 | 0.0E+00 | 4.4E-05 | -    | 1.4E-05 | 4.6E-05 | -    | 1.6E-05 | 8.2E-05 |
|                         | below |      | 0.0E+00 | 4.4E-05 |      | 1.8E-05 | 7.0E-05 |      | 1.8E-05 | 7.9E-05 |      | 0.0E+00 | 7.9E-05 |      | 0.0E+00 | 6.0E-05 |
| <i>F-Fingoldia</i>      | above | -    | 1.5E-05 | 5.2E-05 | -    | 0.0E+00 | 1.5E-05 | -    | 0.0E+00 | 1.5E-05 | -    | 0.0E+00 | 1.9E-05 | -    | 7.3E-06 | 3.9E-05 |
|                         | below |      | 0.0E+00 | 1.5E-05 |      | 0.0E+00 | 2.2E-05 |      | 0.0E+00 | 3.6E-05 |      | 0.0E+00 | 2.5E-05 |      | 0.0E+00 | 2.1E-05 |
| <i>F-Peptoniphilus</i>  | above | -    | 2.2E-05 | 6.0E-05 | -    | 1.0E-05 | 4.0E-05 | 0.00 | 0.0E+00 | 3.0E-05 | -    | 0.0E+00 | 4.7E-05 | -    | 2.0E-05 | 6.5E-05 |
|                         | below |      | 0.0E+00 | 7.7E-05 |      | 0.0E+00 | 8.1E-05 |      | 2.1E-05 | 8.7E-05 |      | 0.0E+00 | 8.2E-05 |      | 0.0E+00 | 7.2E-05 |
| <i>F-Megasphaera</i>    | above | -    | 0.0E+00 | 2.9E-05 | -    | 0.0E+00 | 2.5E-05 | -    | 0.0E+00 | 6.6E-06 | -    | 0.0E+00 | 1.7E-05 | -    | 0.0E+00 | 4.6E-04 |
|                         | below |      | 0.0E+00 | 0.0E+00 |      | 0.0E+00 | 2.1E-05 |      | 0.0E+00 | 1.5E-03 |      | 0.0E+00 | 1.5E-03 |      | 0.0E+00 | 2.1E-05 |
| <i>F-Veillonella</i>    | above | 0.21 | 5.5E-05 | 1.6E-04 | 0.44 | 5.9E-05 | 3.8E-04 | 0.39 | 5.2E-05 | 6.5E-04 | 0.29 | 5.5E-05 | 4.0E-04 | 0.44 | 5.9E-05 | 3.8E-04 |
|                         | below |      | 2.6E-04 | 8.9E-04 |      | 1.3E-04 | 8.9E-04 |      | 1.3E-04 | 5.7E-04 |      | 1.9E-04 | 1.0E-03 |      | 1.4E-04 | 7.4E-04 |
| <i>P-Campylobacter</i>  | above | -    | 0.0E+00 | 4.1E-05 | -    | 0.0E+00 | 2.4E-05 | -    | 0.0E+00 | 2.9E-05 | -    | 0.0E+00 | 2.4E-05 | -    | 0.0E+00 | 2.8E-05 |
|                         | below |      | 0.0E+00 | 2.6E-05 |      | 0.0E+00 | 3.9E-05 |      | 0.0E+00 | 3.5E-05 |      | 0.0E+00 | 7.6E-05 |      | 0.0E+00 | 3.1E-05 |
| <i>P-Esch./Shigella</i> | above | 0.62 | 1.3E-02 | 3.9E-02 | 0.29 | 7.3E-03 | 3.8E-02 | 0.18 | 6.3E-03 | 2.5E-02 | 0.41 | 1.1E-02 | 4.1E-02 | 0.45 | 9.5E-03 | 3.8E-02 |
|                         | below |      | 2.1E-02 | 4.0E-02 |      | 2.5E-02 | 3.4E-02 |      | 3.5E-02 | 4.4E-02 |      | 2.7E-02 | 4.5E-02 |      | 2.1E-02 | 5.2E-02 |
| <i>P-Acinetobacter</i>  | above | 0.73 | 3.2E-05 | 3.8E-05 | 0.49 | 3.0E-05 | 3.2E-05 | 0.26 | 2.9E-05 | 3.1E-05 | 0.56 | 3.4E-05 | 3.0E-05 | 0.48 | 3.0E-05 | 3.1E-05 |
|                         | below |      | 4.4E-05 | 2.1E-04 |      | 6.1E-05 | 2.3E-04 |      | 1.1E-04 | 4.0E-04 |      | 6.2E-05 | 2.8E-04 |      | 6.2E-05 | 2.4E-04 |

## SUPPLEMENTAL FIGURE 11

Continued.

|                                | Group | OPV Vaccine |          |          | Tuberculosis Vaccine |          |          | Positive Control (SEB) |          |          |
|--------------------------------|-------|-------------|----------|----------|----------------------|----------|----------|------------------------|----------|----------|
|                                |       | Ratio       | Median   | IQR      | Ratio                | Median   | IQR      | Ratio                  | Median   | IQR      |
| <b>Phylum</b>                  |       |             |          |          |                      |          |          |                        |          |          |
| <i>Actinobacteria (A)</i>      | above | 1.08        | 8.50E-01 | 1.88E-01 | 1.06                 | 8.29E-01 | 1.77E-01 | 1.09                   | 8.38E-01 | 2.77E-01 |
|                                | below |             | 7.84E-01 | 4.97E-01 |                      | 7.84E-01 | 4.15E-01 |                        | 7.67E-01 | 4.12E-01 |
| <i>Bacteroidetes (B)</i>       | above | 1.49        | 3.93E-04 | 6.30E-03 | 4.15                 | 5.46E-04 | 1.72E-02 | 0.47                   | 2.93E-04 | 4.95E-03 |
|                                | below |             | 2.63E-04 | 2.64E-03 |                      | 1.32E-04 | 2.37E-03 |                        | 6.28E-04 | 5.95E-03 |
| <i>Firmicutes (F)</i>          | above | 0.94        | 8.86E-02 | 1.04E-01 | 0.97                 | 8.94E-02 | 1.07E-01 | 0.97                   | 8.94E-02 | 9.15E-02 |
|                                | below |             | 9.38E-02 | 1.36E-01 |                      | 9.21E-02 | 1.53E-01 |                        | 9.21E-02 | 1.32E-01 |
| <i>Proteobacteria (P)</i>      | above | 0.44        | 2.61E-02 | 9.57E-02 | 0.81                 | 4.01E-02 | 1.46E-01 | 0.36                   | 2.08E-02 | 1.41E-01 |
|                                | below |             | 5.93E-02 | 1.40E-01 |                      | 4.92E-02 | 1.36E-01 |                        | 5.80E-02 | 1.24E-01 |
| <b>Class</b>                   |       |             |          |          |                      |          |          |                        |          |          |
| <i>A-Actinobacteria</i>        | above | 1.08        | 8.50E-01 | 1.88E-01 | 1.06                 | 8.29E-01 | 1.77E-01 | 1.09                   | 8.38E-01 | 2.77E-01 |
|                                | below |             | 7.84E-01 | 4.97E-01 |                      | 7.84E-01 | 4.15E-01 |                        | 7.67E-01 | 4.12E-01 |
| <i>B-Bacteroidia</i>           | above | 1.58        | 3.93E-04 | 6.32E-03 | 4.74                 | 5.46E-04 | 1.72E-02 | 0.45                   | 2.86E-04 | 4.95E-03 |
|                                | below |             | 2.49E-04 | 2.64E-03 |                      | 1.15E-04 | 2.29E-03 |                        | 6.28E-04 | 5.95E-03 |
| <i>F-Bacilli</i>               | above | 1.03        | 7.96E-02 | 1.04E-01 | 1.04                 | 8.08E-02 | 1.11E-01 | 1.12                   | 8.33E-02 | 8.76E-02 |
|                                | below |             | 7.75E-02 | 1.42E-01 |                      | 7.75E-02 | 1.13E-01 |                        | 7.44E-02 | 1.45E-01 |
| <i>F-Clostridia</i>            | above | 0.57        | 2.40E-03 | 1.72E-02 | 0.53                 | 3.18E-03 | 1.20E-02 | 1.48                   | 4.23E-03 | 1.82E-02 |
|                                | below |             | 4.23E-03 | 1.15E-02 |                      | 6.04E-03 | 2.24E-02 |                        | 2.85E-03 | 6.80E-03 |
| <i>P-Alphaproteobacteria</i>   | above | 0.00        | 0.00E+00 | 0.00E+00 | -                    | 0.00E+00 | 1.82E-05 | -                      | 0.00E+00 | 1.56E-05 |
|                                | below |             | 1.27E-05 | 2.03E-05 |                      | 0.00E+00 | 1.27E-05 |                        | 0.00E+00 | 1.57E-05 |
| <i>P-Betaproteobacteria</i>    | above | -           | 0.00E+00 | 3.98E-05 | -                    | 7.10E-06 | 5.85E-05 | -                      | 0.00E+00 | 2.29E-05 |
|                                | below |             | 0.00E+00 | 1.42E-05 |                      | 0.00E+00 | 0.00E+00 |                        | 0.00E+00 | 1.42E-05 |
| <i>P-Epsilonproteobacteria</i> | above | -           | 0.00E+00 | 3.51E-05 | -                    | 0.00E+00 | 3.66E-05 | -                      | 7.34E-06 | 4.08E-05 |
|                                | below |             | 0.00E+00 | 1.47E-05 |                      | 0.00E+00 | 2.57E-05 |                        | 0.00E+00 | 1.27E-05 |
| <i>P-Gammaproteobacteria</i>   | above | 0.44        | 2.60E-02 | 9.54E-02 | 0.50                 | 2.44E-02 | 1.01E-01 | 0.27                   | 1.59E-02 | 6.42E-02 |
|                                | below |             | 5.93E-02 | 1.42E-01 |                      | 4.92E-02 | 1.35E-01 |                        | 5.78E-02 | 1.24E-01 |
| <b>Order</b>                   |       |             |          |          |                      |          |          |                        |          |          |
| <i>A-Actinomycetales</i>       | above | 0.43        | 1.59E-03 | 2.66E-03 | 1.76                 | 2.67E-03 | 3.06E-03 | 1.69                   | 2.67E-03 | 3.99E-03 |
|                                | below |             | 3.68E-03 | 4.50E-03 |                      | 1.51E-03 | 4.81E-03 |                        | 1.58E-03 | 3.23E-03 |
| <i>A-Bifidobacteriales</i>     | above | 1.12        | 8.40E-01 | 1.69E-01 | 1.07                 | 8.20E-01 | 1.51E-01 | 1.09                   | 8.32E-01 | 2.71E-01 |
|                                | below |             | 7.52E-01 | 4.92E-01 |                      | 7.66E-01 | 5.11E-01 |                        | 7.66E-01 | 4.02E-01 |
| <i>A-Coriobacteriales</i>      | above | 5.77        | 1.04E-04 | 2.27E-02 | 3.23                 | 5.45E-05 | 2.49E-03 | 0.55                   | 2.36E-05 | 3.69E-04 |
|                                | below |             | 1.81E-05 | 1.35E-04 |                      | 1.69E-05 | 2.18E-03 |                        | 4.26E-05 | 3.91E-03 |
| <i>B-Bacteroidales</i>         | above | 1.58        | 3.93E-04 | 6.32E-03 | 4.74                 | 5.46E-04 | 1.72E-02 | 0.45                   | 2.86E-04 | 4.95E-03 |
|                                | below |             | 2.49E-04 | 2.64E-03 |                      | 1.15E-04 | 2.29E-03 |                        | 6.28E-04 | 5.95E-03 |
| <i>F-Bacillales</i>            | above | 0.50        | 3.55E-04 | 7.30E-04 | 0.58                 | 4.08E-04 | 7.76E-04 | 1.15                   | 5.40E-04 | 7.76E-04 |
|                                | below |             | 7.08E-04 | 8.34E-04 |                      | 7.08E-04 | 8.87E-04 |                        | 4.68E-04 | 1.00E-03 |

### SUPPLEMENTAL FIGURE 12

Relative abundance of stool bacteria in infants above and below median vaccine responses (CD8 T-cell SI). Positive and negative associations are highlighted in blue and orange, respectively; statistical analysis is described in the legend to Supplemental Figure 10. Esch., *Escherichia*; IQR, interquartile range.

|                             |       |      |          |          |                 |          |          |      |          |          |
|-----------------------------|-------|------|----------|----------|-----------------|----------|----------|------|----------|----------|
| <i>F-Lactobacillales</i>    | above | 1.04 | 7.80E-02 | 9.31E-02 | 1.06            | 7.91E-02 | 1.01E-01 | 1.13 | 8.17E-02 | 7.72E-02 |
|                             | below |      | 7.48E-02 | 1.41E-01 |                 | 7.48E-02 | 1.12E-01 |      | 7.24E-02 | 1.43E-01 |
| <i>F-Clostridiales</i>      | above | 0.57 | 2.40E-03 | 1.72E-02 | 0.53            | 3.18E-03 | 1.20E-02 | 1.48 | 4.23E-03 | 1.82E-02 |
|                             | below |      | 4.23E-03 | 1.15E-02 |                 | 6.04E-03 | 2.24E-02 |      | 2.85E-03 | 6.75E-03 |
| <i>P-Burkholderiales</i>    | above | -    | 0.00E+00 | 3.98E-05 | 89 <sup>a</sup> | 0.00E+00 | 5.85E-05 | -    | 0.00E+00 | 2.29E-05 |
|                             | below |      | 0.00E+00 | 1.42E-05 |                 | 0.00E+00 | 0.00E+00 |      | 0.00E+00 | 0.00E+00 |
| <i>P-Campylobacteriales</i> | above | -    | 0.00E+00 | 3.51E-05 | -               | 0.00E+00 | 3.66E-05 | -    | 7.34E-06 | 4.08E-05 |
|                             | below |      | 0.00E+00 | 1.47E-05 |                 | 0.00E+00 | 2.57E-05 |      | 0.00E+00 | 1.27E-05 |
| <i>P-Enterobacteriales</i>  | above | 0.44 | 2.50E-02 | 8.94E-02 | 0.50            | 2.35E-02 | 9.68E-02 | 0.27 | 1.52E-02 | 6.15E-02 |
|                             | below |      | 5.64E-02 | 1.36E-01 |                 | 4.73E-02 | 1.27E-01 |      | 5.64E-02 | 1.19E-01 |
| <i>P-Pasteurellales</i>     | above | -    | 0.00E+00 | 0.00E+00 | -               | 0.00E+00 | 2.15E-05 | -    | 0.00E+00 | 3.15E-05 |
|                             | below |      | 0.00E+00 | 3.15E-05 |                 | 0.00E+00 | 0.00E+00 |      | 0.00E+00 | 0.00E+00 |
| <i>P-Pseudomonadales</i>    | above | 0.65 | 4.68E-05 | 1.01E-04 | 0.71            | 5.16E-05 | 7.88E-05 | 0.54 | 4.90E-05 | 4.49E-05 |
|                             | below |      | 7.23E-05 | 2.11E-04 |                 | 7.23E-05 | 2.22E-04 |      | 9.02E-05 | 3.33E-04 |
| <b>Family</b>               |       |      |          |          |                 |          |          |      |          |          |
| <i>A-Actinomycetaceae</i>   | above | -    | 0.00E+00 | 3.98E-05 | -               | 6.95E-06 | 9.98E-05 | -    | 0.00E+00 | 6.78E-05 |
|                             | below |      | 0.00E+00 | 8.13E-05 |                 | 0.00E+00 | 5.42E-05 |      | 0.00E+00 | 3.74E-05 |
| <i>A-Corynebacteriaceae</i> | above | 0.92 | 7.14E-05 | 9.62E-05 | 1.20            | 8.02E-05 | 1.02E-04 | 1.42 | 8.47E-05 | 1.18E-04 |
|                             | below |      | 7.75E-05 | 1.27E-04 |                 | 6.71E-05 | 1.44E-04 |      | 5.98E-05 | 1.17E-04 |
| <i>A-Micrococcaceae</i>     | above | 0.38 | 1.01E-03 | 1.09E-03 | 1.39            | 1.37E-03 | 2.06E-03 | 1.39 | 1.37E-03 | 2.10E-03 |
|                             | below |      | 2.63E-03 | 3.39E-03 |                 | 9.88E-04 | 3.02E-03 |      | 9.88E-04 | 2.41E-03 |
| <i>A-Bifidobacteriaceae</i> | above | 1.12 | 8.40E-01 | 1.69E-01 | 1.07            | 8.20E-01 | 1.51E-01 | 1.09 | 8.32E-01 | 2.71E-01 |
|                             | below |      | 7.52E-01 | 4.92E-01 |                 | 7.66E-01 | 5.11E-01 |      | 7.66E-01 | 4.02E-01 |
| <i>A-Coriobacteriaceae</i>  | above | 5.76 | 1.04E-04 | 2.27E-02 | 3.22            | 5.45E-05 | 2.49E-03 | 0.55 | 2.36E-05 | 3.69E-04 |
|                             | below |      | 1.81E-05 | 1.35E-04 |                 | 1.69E-05 | 2.18E-03 |      | 4.26E-05 | 3.91E-03 |
| <i>B-Bacteroidaceae</i>     | above | 0.84 | 6.83E-05 | 9.69E-04 | 4.48            | 1.29E-04 | 3.92E-03 | 0.96 | 7.21E-05 | 9.89E-04 |
|                             | below |      | 8.14E-05 | 1.17E-03 |                 | 2.88E-05 | 8.27E-04 |      | 7.48E-05 | 1.52E-03 |
| <i>B-Porphyromonadaceae</i> | above | -    | 2.87E-05 | 2.20E-04 | -               | 1.74E-05 | 7.20E-05 | -    | 2.87E-05 | 2.70E-04 |
|                             | below |      | 0.00E+00 | 2.05E-05 |                 | 0.00E+00 | 3.80E-05 |      | 0.00E+00 | 2.05E-05 |
| <i>B-Prevotellaceae</i>     | above | -    | 0.00E+00 | 4.41E-05 | -               | 0.00E+00 | 1.82E-05 | -    | 0.00E+00 | 7.25E-06 |
|                             | below |      | 0.00E+00 | 1.27E-05 |                 | 0.00E+00 | 1.45E-05 |      | 0.00E+00 | 3.64E-05 |
| <i>F-Staphylococcaceae</i>  | above | 0.32 | 2.02E-04 | 4.13E-04 | 0.70            | 3.33E-04 | 5.30E-04 | 1.55 | 4.98E-04 | 5.74E-04 |
|                             | below |      | 6.39E-04 | 5.91E-04 |                 | 4.79E-04 | 6.90E-04 |      | 3.21E-04 | 5.45E-04 |
| <i>F-Camobacteriaceae</i>   | above | 0.57 | 3.82E-05 | 7.43E-05 | 2.08            | 6.03E-05 | 1.60E-04 | 1.14 | 6.20E-05 | 9.73E-05 |
|                             | below |      | 6.68E-05 | 1.57E-04 |                 | 2.90E-05 | 8.13E-05 |      | 5.42E-05 | 9.35E-05 |
| <i>F-Enterococcaceae</i>    | above | 7.40 | 6.62E-04 | 2.32E-03 | 12.11           | 1.45E-03 | 4.83E-03 | 2.32 | 5.37E-04 | 2.29E-03 |
|                             | below |      | 8.94E-05 | 1.44E-03 |                 | 1.20E-04 | 4.90E-04 |      | 2.31E-04 | 7.27E-04 |
| <i>F-Lactobacillaceae</i>   | above | 1.66 | 1.69E-04 | 7.89E-04 | 0.22            | 9.32E-05 | 8.00E-04 | 0.89 | 1.46E-04 | 2.08E-03 |
|                             | below |      | 1.02E-04 | 4.75E-03 |                 | 4.28E-04 | 4.33E-03 |      | 1.64E-04 | 4.34E-03 |
| <i>F-Streptococcaceae</i>   | above | 0.86 | 4.08E-02 | 4.68E-02 | 0.86            | 4.03E-02 | 4.90E-02 | 1.09 | 4.43E-02 | 3.51E-02 |
|                             | below |      | 4.77E-02 | 9.22E-02 |                 | 4.69E-02 | 1.04E-01 |      | 4.08E-02 | 9.28E-02 |

## SUPPLEMENTAL FIGURE 12

Continued.

|                              |       |      |          |          |      |          |          |      |          |          |
|------------------------------|-------|------|----------|----------|------|----------|----------|------|----------|----------|
| <i>F-Clostridiaceae</i>      | above | 0.15 | 7.50E-06 | 8.07E-04 | 0.32 | 1.55E-05 | 5.78E-04 | 0.14 | 1.02E-05 | 5.47E-04 |
|                              | below |      | 4.88E-05 | 4.08E-04 |      | 4.88E-05 | 3.45E-04 |      | 7.03E-05 | 4.08E-04 |
| <i>F-XI (Incertae Sedis)</i> | above | 5.30 | 7.69E-05 | 1.94E-04 | 1.70 | 5.36E-05 | 1.67E-04 | 1.70 | 5.36E-05 | 2.30E-04 |
|                              | below |      | 1.45E-05 | 8.91E-05 |      | 3.15E-05 | 1.38E-04 |      | 3.15E-05 | 1.05E-04 |
| <i>F-Lachnospiraceae</i>     | above | -    | 7.50E-06 | 6.13E-04 | -    | 0.00E+00 | 5.67E-05 | -    | 0.00E+00 | 5.92E-04 |
|                              | below |      | 0.00E+00 | 1.47E-05 |      | 0.00E+00 | 2.05E-05 |      | 0.00E+00 | 1.57E-05 |
| <i>F-Veillonellaceae</i>     | above | 0.16 | 2.61E-04 | 1.55E-03 | 1.43 | 8.44E-04 | 1.82E-03 | 1.43 | 8.46E-04 | 6.08E-03 |
|                              | below |      | 1.63E-03 | 6.27E-03 |      | 5.91E-04 | 4.56E-03 |      | 5.91E-04 | 1.82E-03 |
| <i>P-Campylobacteraceae</i>  | above | -    | 0.00E+00 | 3.52E-05 | -    | 0.00E+00 | 3.66E-05 | -    | 7.35E-06 | 4.08E-05 |
|                              | below |      | 0.00E+00 | 1.47E-05 |      | 0.00E+00 | 2.57E-05 |      | 0.00E+00 | 1.27E-05 |
| <i>P-Enterobacteriaceae</i>  | above | 0.44 | 2.50E-02 | 8.94E-02 | 0.50 | 2.35E-02 | 9.68E-02 | 0.27 | 1.52E-02 | 6.15E-02 |
|                              | below |      | 5.64E-02 | 1.36E-01 |      | 4.73E-02 | 1.27E-01 |      | 5.64E-02 | 1.19E-01 |
| <i>P-Pasteurellaceae</i>     | above | -    | 0.00E+00 | 0.00E+00 | -    | 0.00E+00 | 2.15E-05 | -    | 0.00E+00 | 3.15E-05 |
|                              | below |      | 0.00E+00 | 3.15E-05 |      | 0.00E+00 | 0.00E+00 |      | 0.00E+00 | 0.00E+00 |
| <i>P-Moraxellaceae</i>       | above | 0.91 | 4.09E-05 | 1.02E-04 | 0.91 | 4.07E-05 | 7.26E-05 | 0.47 | 3.19E-05 | 5.07E-05 |
|                              | below |      | 4.47E-05 | 2.07E-04 |      | 4.49E-05 | 2.28E-04 |      | 6.77E-05 | 3.48E-04 |
| <i>P-Pseudomonadaceae</i>    | above | 0.00 | 0.00E+00 | 1.40E-05 | -    | 1.36E-05 | 1.78E-05 | -    | 1.39E-05 | 2.15E-05 |
|                              | below |      | 1.46E-05 | 2.90E-05 |      | 0.00E+00 | 2.26E-05 |      | 0.00E+00 | 1.49E-05 |
| <b>Genus</b>                 |       |      |          |          |      |          |          |      |          |          |
| <i>A-Actinomyces</i>         | above | -    | 0.00E+00 | 1.50E-05 | -    | 0.00E+00 | 7.42E-05 | -    | 0.00E+00 | 4.86E-05 |
|                              | below |      | 0.00E+00 | 6.77E-05 |      | 0.00E+00 | 3.61E-05 |      | 0.00E+00 | 3.74E-05 |
| <i>A-Corynebacterium</i>     | above | 0.92 | 7.14E-05 | 1.01E-04 | 1.20 | 8.02E-05 | 1.06E-04 | 1.41 | 8.46E-05 | 1.30E-04 |
|                              | below |      | 7.75E-05 | 1.27E-04 |      | 6.71E-05 | 1.44E-04 |      | 5.98E-05 | 1.17E-04 |
| <i>A-Rothia</i>              | above | 0.39 | 9.63E-04 | 1.05E-03 | 1.40 | 1.29E-03 | 1.96E-03 | 1.51 | 1.29E-03 | 1.98E-03 |
|                              | below |      | 2.48E-03 | 2.98E-03 |      | 9.21E-04 | 2.99E-03 |      | 8.53E-04 | 2.38E-03 |
| <i>A-Bifidobacterium</i>     | above | 1.08 | 7.08E-01 | 1.35E-01 | 1.06 | 6.97E-01 | 1.15E-01 | 1.08 | 7.03E-01 | 2.11E-01 |
|                              | below |      | 6.55E-01 | 4.17E-01 |      | 6.55E-01 | 4.04E-01 |      | 6.50E-01 | 3.27E-01 |
| <i>A-Collinsella</i>         | above | 1.52 | 2.36E-05 | 3.29E-03 | -    | 2.36E-05 | 1.80E-03 | 0.25 | 7.75E-06 | 4.56E-05 |
|                              | below |      | 1.55E-05 | 3.80E-05 |      | 0.00E+00 | 1.32E-04 |      | 3.14E-05 | 2.55E-03 |
| <i>B-Bacteroides</i>         | above | 0.84 | 6.83E-05 | 9.69E-04 | 4.48 | 1.29E-04 | 3.92E-03 | 0.96 | 7.20E-05 | 9.89E-04 |
|                              | below |      | 8.14E-05 | 1.17E-03 |      | 2.88E-05 | 8.27E-04 |      | 7.48E-05 | 1.52E-03 |
| <i>B-Parabacteroides</i>     | above | -    | 8.23E-06 | 8.71E-05 | -    | 0.00E+00 | 5.03E-05 | -    | 8.23E-06 | 1.81E-04 |
|                              | below |      | 0.00E+00 | 0.00E+00 |      | 0.00E+00 | 3.80E-05 |      | 0.00E+00 | 0.00E+00 |
| <i>B-Prevotella</i>          | above | -    | 0.00E+00 | 2.90E-05 | -    | 0.00E+00 | 9.35E-06 | -    | 0.00E+00 | 7.25E-06 |
|                              | below |      | 0.00E+00 | 1.27E-05 |      | 0.00E+00 | 1.45E-05 |      | 0.00E+00 | 1.87E-05 |
| <i>F-Gemella</i>             | above | 0.80 | 1.80E-05 | 8.38E-05 | 1.13 | 2.23E-05 | 9.77E-05 | 0.42 | 1.71E-05 | 3.59E-05 |
|                              | below |      | 2.23E-05 | 6.29E-05 |      | 1.97E-05 | 6.29E-05 |      | 4.10E-05 | 1.31E-04 |
| <i>F-Staphylococcus</i>      | above | 0.33 | 1.21E-04 | 2.03E-04 | 0.40 | 1.25E-04 | 2.72E-04 | 1.88 | 2.35E-04 | 5.49E-04 |
|                              | below |      | 3.66E-04 | 5.33E-04 |      | 3.12E-04 | 5.38E-04 |      | 1.25E-04 | 4.35E-04 |
| <i>F-Dolosigranulum</i>      | above | -    | 1.81E-05 | 3.25E-05 | 0.61 | 9.09E-06 | 4.86E-05 | -    | 2.16E-05 | 5.47E-05 |
|                              | below |      | 0.00E+00 | 5.87E-05 |      | 1.50E-05 | 2.90E-05 |      | 0.00E+00 | 2.57E-05 |

## SUPPLEMENTAL FIGURE 12

Continued.

|                         |       |      |          |          |      |          |          |      |          |          |
|-------------------------|-------|------|----------|----------|------|----------|----------|------|----------|----------|
| <i>F-Enterococcus</i>   | above | -    | 6.55E-05 | 1.82E-04 | 8.33 | 1.37E-04 | 8.21E-04 | 2.19 | 6.55E-05 | 2.08E-04 |
|                         | below |      | 0.00E+00 | 5.98E-04 |      | 1.65E-05 | 7.34E-05 |      | 2.99E-05 | 6.23E-04 |
| <i>F-Lactobacillus</i>  | above | 2.48 | 5.05E-05 | 3.76E-04 | 0.29 | 3.29E-05 | 3.54E-04 | 1.27 | 5.69E-05 | 8.55E-04 |
|                         | below |      | 2.03E-05 | 1.04E-03 |      | 1.15E-04 | 1.04E-03 |      | 4.49E-05 | 9.77E-04 |
| <i>F-Lactococcus</i>    | above | 0.67 | 1.35E-04 | 1.03E-04 | 0.81 | 1.53E-04 | 9.69E-05 | 1.02 | 1.83E-04 | 1.04E-04 |
|                         | below |      | 2.01E-04 | 2.07E-04 |      | 1.90E-04 | 2.08E-04 |      | 1.79E-04 | 2.20E-04 |
| <i>F-Streptococcus</i>  | above | 0.84 | 3.75E-02 | 4.45E-02 | 0.86 | 3.72E-02 | 4.66E-02 | 1.01 | 3.81E-02 | 4.12E-02 |
|                         | below |      | 4.44E-02 | 4.53E-02 |      | 4.33E-02 | 3.99E-02 |      | 3.78E-02 | 7.75E-02 |
| <i>F-Clostridium</i>    | above | -    | 0.00E+00 | 2.04E-04 | -    | 0.00E+00 | 2.38E-04 | -    | 0.00E+00 | 2.38E-04 |
|                         | below |      | 0.00E+00 | 4.18E-05 |      | 0.00E+00 | 3.26E-05 |      | 0.00E+00 | 4.18E-05 |
| <i>F-Anaerococcus</i>   | above | -    | 4.00E-05 | 1.04E-04 | -    | 1.81E-05 | 5.91E-05 | -    | 4.31E-05 | 1.35E-04 |
|                         | below |      | 0.00E+00 | 4.39E-05 |      | 0.00E+00 | 5.98E-05 |      | 0.00E+00 | 3.78E-05 |
| <i>F-Finegoldia</i>     | above | -    | 0.00E+00 | 4.07E-05 | -    | 0.00E+00 | 1.96E-05 | -    | 7.25E-06 | 4.01E-05 |
|                         | below |      | 0.00E+00 | 1.82E-05 |      | 0.00E+00 | 4.51E-05 |      | 0.00E+00 | 2.05E-05 |
| <i>F-Peptoniphilus</i>  | above | -    | 2.03E-05 | 7.47E-05 | -    | 1.05E-05 | 7.79E-05 | -    | 9.84E-06 | 6.50E-05 |
|                         | below |      | 0.00E+00 | 3.15E-05 |      | 0.00E+00 | 4.49E-05 |      | 0.00E+00 | 7.23E-05 |
| <i>F-Megasphaera</i>    | above | -    | 0.00E+00 | 1.72E-05 | -    | 0.00E+00 | 1.72E-05 | -    | 0.00E+00 | 4.89E-04 |
|                         | below |      | 0.00E+00 | 9.12E-04 |      | 0.00E+00 | 9.12E-04 |      | 0.00E+00 | 0.00E+00 |
| <i>F-Veillonella</i>    | above | 0.29 | 7.66E-05 | 2.41E-04 | 2.93 | 2.26E-04 | 8.18E-04 | 0.58 | 7.75E-05 | 3.79E-04 |
|                         | below |      | 2.61E-04 | 9.16E-04 |      | 7.71E-05 | 2.44E-04 |      | 1.34E-04 | 7.79E-04 |
| <i>P-Campylobacter</i>  | above | -    | 0.00E+00 | 3.51E-05 | -    | 0.00E+00 | 3.66E-05 | -    | 7.34E-06 | 4.08E-05 |
|                         | below |      | 0.00E+00 | 1.47E-05 |      | 0.00E+00 | 2.57E-05 |      | 0.00E+00 | 1.27E-05 |
| <i>P-Esch./Shigella</i> | above | 0.61 | 1.29E-02 | 4.01E-02 | 0.52 | 1.09E-02 | 3.44E-02 | 0.35 | 7.30E-03 | 3.75E-02 |
|                         | below |      | 2.11E-02 | 3.88E-02 |      | 2.11E-02 | 4.88E-02 |      | 2.11E-02 | 4.48E-02 |
| <i>P-Acinetobacter</i>  | above | 0.93 | 4.09E-05 | 1.02E-04 | 0.91 | 4.07E-05 | 7.26E-05 | 0.65 | 2.92E-05 | 3.89E-05 |
|                         | below |      | 4.39E-05 | 1.16E-04 |      | 4.47E-05 | 1.97E-04 |      | 4.51E-05 | 3.48E-04 |

<sup>a</sup>Ratio calculated with means as median values were both zero.

#### SUPPLEMENTAL FIGURE 12

Continued.

| Phylum         | Class |    |     | Order           |                 |                 | Family          |                 |                    | Genus              |                     |                    |                    |                 |                 |                |        |  |  |  |
|----------------|-------|----|-----|-----------------|-----------------|-----------------|-----------------|-----------------|--------------------|--------------------|---------------------|--------------------|--------------------|-----------------|-----------------|----------------|--------|--|--|--|
|                | OP    | TT | HBV | OP              | TT              | HBV             | OP              | TT              | HBV                | OP                 | TT                  | HBV                |                    |                 |                 |                |        |  |  |  |
|                | P     | P  | B   | P               | P               | B               | P               | P               | B                  | P                  | P                   | B                  |                    |                 |                 |                |        |  |  |  |
|                | V     | D  | V   | V               | D               | V               | V               | D               | V                  | V                  | D                   | V                  |                    |                 |                 |                |        |  |  |  |
| Actinobacteria |       |    |     | Actinobacteria  |                 |                 | Actinomycetales |                 |                    | Actinomycetaceae   |                     |                    | Actinomyces        |                 |                 |                |        |  |  |  |
|                |       |    |     |                 |                 |                 |                 |                 |                    |                    | Corynebacteriaceae  |                    |                    |                 | Corynebacterium |                |        |  |  |  |
|                |       |    |     |                 |                 |                 |                 |                 |                    |                    | Micrococcaceae      |                    |                    |                 | Rothia          |                |        |  |  |  |
|                |       |    |     |                 |                 |                 |                 |                 |                    |                    | Bifidobacteriaceae  |                    |                    |                 | Bifidobacterium |                |        |  |  |  |
|                |       |    |     |                 |                 |                 |                 |                 |                    |                    | Coriobacteriaceae   |                    |                    |                 | Collinsella     |                |        |  |  |  |
| Bacteroidetes  |       |    |     | Bacteroidia     |                 |                 | Bacteroidales   |                 |                    | Bacteroidaceae     |                     |                    | Bacteroides        |                 |                 |                |        |  |  |  |
|                |       |    |     |                 |                 |                 |                 |                 |                    | Porphyromonadaceae |                     |                    |                    | Parabacteroides |                 |                |        |  |  |  |
|                |       |    |     |                 |                 |                 |                 |                 |                    | Prevotellaceae     |                     |                    |                    | Prevotella      |                 |                |        |  |  |  |
|                |       |    |     |                 |                 |                 |                 |                 |                    | Staphylococcaceae  |                     |                    |                    | Gemella         |                 |                |        |  |  |  |
| Firmicutes     |       |    |     | Bacilli         |                 |                 | Bacillales      |                 |                    | Staphylococcaceae  |                     |                    | Staphylococcus     |                 |                 |                |        |  |  |  |
|                |       |    |     |                 |                 |                 |                 |                 |                    | Camobacteriaceae   |                     |                    |                    | Dolosigranulum  |                 |                |        |  |  |  |
|                |       |    |     |                 |                 |                 |                 |                 |                    | Enterococcaceae    |                     |                    |                    | Enterococcus    |                 |                |        |  |  |  |
|                |       |    |     |                 |                 |                 |                 |                 | Lactobacillaceae   |                    |                     |                    | Lactobacillus      |                 |                 |                |        |  |  |  |
|                |       |    |     |                 |                 |                 |                 |                 | Streptococcaceae   |                    |                     |                    | Lactococcus        |                 |                 |                |        |  |  |  |
|                |       |    |     |                 |                 |                 |                 |                 |                    |                    |                     |                    | Streptococcus      |                 |                 |                |        |  |  |  |
|                |       |    |     |                 | Clostridia      |                 |                 | Clostridiales   |                    |                    | Clostridiaceae      |                    |                    | Clostridium     |                 |                |        |  |  |  |
|                |       |    |     |                 |                 |                 |                 |                 |                    |                    | XI (Incertae Sedis) |                    |                    | Anaerococcus    |                 |                |        |  |  |  |
|                |       |    |     |                 |                 |                 |                 |                 |                    |                    |                     |                    |                    | Finegoldia      |                 |                |        |  |  |  |
|                |       |    |     |                 |                 |                 |                 |                 |                    |                    |                     |                    |                    | Peptoniphilus   |                 |                |        |  |  |  |
|                |       |    |     |                 |                 |                 |                 |                 |                    |                    |                     |                    |                    | (none)          |                 |                |        |  |  |  |
|                |       |    |     |                 |                 |                 |                 |                 |                    |                    |                     |                    |                    | Lachnospiraceae |                 |                |        |  |  |  |
|                |       |    |     |                 |                 |                 |                 |                 |                    |                    |                     |                    |                    | Veillonellaceae |                 |                |        |  |  |  |
|                |       |    |     |                 |                 |                 |                 |                 |                    |                    |                     | Megasphaera        |                    |                 |                 |                |        |  |  |  |
|                |       |    |     |                 |                 |                 |                 |                 |                    |                    |                     | Veillonella        |                    |                 |                 |                |        |  |  |  |
| Proteobacteria |       |    |     | αProteobacteria |                 |                 | (none)          |                 |                    | (none)             |                     |                    | (none)             |                 |                 |                |        |  |  |  |
|                |       |    |     |                 | βProteobacteria |                 |                 | Burkholderiales |                    |                    | (none)              |                    |                    | (none)          |                 |                |        |  |  |  |
|                |       |    |     |                 |                 | εProteobacteria |                 |                 | Campylobacteriales |                    |                     | Campylobacteraceae |                    |                 | Campylobacter   |                |        |  |  |  |
|                |       |    |     |                 |                 |                 | γProteobacteria |                 |                    | Enterobacteriales  |                     |                    | Enterobacteriaceae |                 |                 | Esch./Shigella |        |  |  |  |
|                |       |    |     |                 |                 |                 |                 |                 |                    |                    | Pasteurellales      |                    |                    | Pasteurellaceae |                 |                | (none) |  |  |  |
|                |       |    |     |                 |                 |                 |                 |                 | Pseudomonadales    |                    |                     | Moraxellaceae      |                    |                 | Acinetobacter   |                |        |  |  |  |
|                |       |    |     |                 |                 |                 |                 |                 |                    |                    | Pseudomonadaceae    |                    |                    | (none)          |                 |                |        |  |  |  |

### SUPPLEMENTAL FIGURE 13

Heat map showing positive (dark blue rectangles) and negative (light orange rectangles) associations of microbiota relative abundance (at the phylum, class, order, family, and genus levels) with vaccine-specific IgG responses to the indicated vaccines (OPV, TT, and HBV vaccine) and with the DTH skin-test response to PPD to assess response to the BCG vaccine against tuberculosis. Significant ( $P < .05$ ) associations were characterized as positive or negative by using Spearman correlation analysis of continuous data (IgG concentrations and area of induration for the skin test, and relative abundance of microbiota) and the Wilcoxon test to compare relative abundance of microbiota in "high" and "low" vaccine responders (those above or below the median response of interest) as described in Methods. Median microbiota relative abundance for vaccine high and low responders are shown in Supplemental Fig 14. Esch., *Escherichia*.

|                                | Group | OPV IgG |          |          | Tuberculosis Skin Test |          |          | TT IgG |          |          | HBV IgG |          |          |
|--------------------------------|-------|---------|----------|----------|------------------------|----------|----------|--------|----------|----------|---------|----------|----------|
|                                |       | Ratio   | Median   | IQR      | Ratio                  | Median   | IQR      | Ratio  | Median   | IQR      | Ratio   | Median   | IQR      |
| <b>Phylum</b>                  |       |         |          |          |                        |          |          |        |          |          |         |          |          |
| <i>Actinobacteria (A)</i>      | above | 1.03    | 8.03E-01 | 2.35E-01 | 1.16                   | 8.46E-01 | 2.45E-01 | 1.01   | 8.30E-01 | 2.70E-01 | 0.80    | 6.60E-01 | 3.80E-01 |
|                                | below |         | 7.81E-01 | 4.02E-01 |                        | 7.29E-01 | 4.91E-01 |        | 8.20E-01 | 4.14E-01 |         | 8.27E-01 | 1.90E-01 |
| <i>Bacteroidetes (B)</i>       | above | 1.95    | 3.47E-04 | 9.25E-03 | 0.22                   | 8.14E-05 | 6.83E-03 | 1.57   | 3.23E-04 | 2.64E-03 | 0.15    | 1.72E-04 | 1.19E-03 |
|                                | below |         | 1.78E-04 | 2.37E-03 |                        | 3.64E-04 | 3.08E-03 |        | 2.06E-04 | 5.92E-03 |         | 1.12E-03 | 2.44E-02 |
| <i>Firmicutes (F)</i>          | above | 0.81    | 8.31E-02 | 8.00E-02 | 1.13                   | 9.38E-02 | 1.07E-01 | 1.08   | 9.21E-02 | 8.84E-02 | 0.82    | 8.76E-02 | 2.61E-01 |
|                                | below |         | 1.02E-01 | 3.01E-01 |                        | 8.31E-02 | 1.49E-01 |        | 8.50E-02 | 1.39E-01 |         | 1.07E-01 | 9.33E-02 |
| <i>Proteobacteria (P)</i>      | above | 1.18    | 4.88E-02 | 1.58E-01 | 0.44                   | 3.00E-02 | 6.20E-02 | 0.61   | 3.35E-02 | 1.36E-01 | 1.29    | 3.86E-02 | 1.62E-01 |
|                                | below |         | 4.13E-02 | 1.36E-01 |                        | 6.81E-02 | 2.07E-01 |        | 5.50E-02 | 1.47E-01 |         | 3.00E-02 | 1.77E-01 |
| <b>Class</b>                   |       |         |          |          |                        |          |          |        |          |          |         |          |          |
| <i>A-Actinobacteria</i>        | above | 1.03    | 8.03E-01 | 2.35E-01 | 1.16                   | 8.46E-01 | 2.45E-01 | 1.01   | 8.30E-01 | 2.70E-01 | 0.80    | 6.60E-01 | 3.80E-01 |
|                                | below |         | 7.81E-01 | 4.02E-01 |                        | 7.29E-01 | 4.91E-01 |        | 8.20E-01 | 4.14E-01 |         | 8.27E-01 | 1.90E-01 |
| <i>B-Bacteroidia</i>           | above | 2.03    | 3.47E-04 | 9.25E-03 | 0.23                   | 8.14E-05 | 6.83E-03 | 1.57   | 3.23E-04 | 2.64E-03 | 0.15    | 1.65E-04 | 1.19E-03 |
|                                | below |         | 1.71E-04 | 2.29E-03 |                        | 3.56E-04 | 3.06E-03 |        | 2.06E-04 | 5.92E-03 |         | 1.12E-03 | 2.44E-02 |
| <i>F-Bacilli</i>               | above | 0.91    | 7.60E-02 | 7.19E-02 | 1.14                   | 8.63E-02 | 1.11E-01 | 1.06   | 8.21E-02 | 8.46E-02 | 1.25    | 8.29E-02 | 2.68E-01 |
|                                | below |         | 8.33E-02 | 2.69E-01 |                        | 7.58E-02 | 1.24E-01 |        | 7.71E-02 | 1.31E-01 |         | 6.60E-02 | 1.07E-01 |
| <i>F-Clostridia</i>            | above | 0.88    | 2.17E-03 | 5.82E-03 | 0.40                   | 1.24E-03 | 1.16E-02 | 0.57   | 1.95E-03 | 1.86E-02 | 0.24    | 1.05E-03 | 3.33E-03 |
|                                | below |         | 2.46E-03 | 2.25E-02 |                        | 3.13E-03 | 1.43E-02 |        | 3.41E-03 | 5.98E-03 |         | 4.38E-03 | 1.59E-02 |
| <i>P-Alphaproteobacteria</i>   | above | -       | 0.00E+00 | 2.03E-05 | -                      | 0.00E+00 | 2.05E-05 | -      | 0.00E+00 | 2.05E-05 | 0.00    | 0.00E+00 | 1.46E-05 |
|                                | below |         | 0.00E+00 | 1.42E-05 |                        | 0.00E+00 | 1.61E-05 |        | 0.00E+00 | 1.46E-05 |         | 1.47E-05 | 2.22E-05 |
| <i>P-Betaproteobacteria</i>    | above | -       | 0.00E+00 | 1.87E-05 | 0.32 <sup>a</sup>      | 0.00E+00 | 0.00E+00 | -      | 0.00E+00 | 1.85E-05 | -       | 0.00E+00 | 1.85E-05 |
|                                | below |         | 0.00E+00 | 2.34E-05 |                        | 0.00E+00 | 3.93E-05 |        | 0.00E+00 | 2.34E-05 |         | 0.00E+00 | 1.42E-05 |
| <i>P-Epsilonproteobacteria</i> | above | -       | 0.00E+00 | 9.77E-05 | -                      | 0.00E+00 | 3.94E-05 | -      | 0.00E+00 | 4.40E-05 | -       | 6.34E-06 | 1.60E-02 |
|                                | below |         | 0.00E+00 | 1.62E-05 |                        | 0.00E+00 | 2.83E-05 |        | 0.00E+00 | 1.93E-05 |         | 0.00E+00 | 1.47E-05 |
| <i>P-Gammaproteobacteria</i>   | above | 0.86    | 3.55E-02 | 1.43E-01 | 0.45                   | 2.84E-02 | 6.21E-02 | 1.18   | 3.34E-02 | 6.76E-02 | 0.53    | 1.58E-02 | 1.43E-01 |
|                                | below |         | 4.13E-02 | 1.35E-01 |                        | 6.31E-02 | 2.05E-01 |        | 2.84E-02 | 1.48E-01 |         | 3.00E-02 | 1.77E-01 |
| <b>Order</b>                   |       |         |          |          |                        |          |          |        |          |          |         |          |          |
| <i>A-Actinomycetales</i>       | above | 1.91    | 3.20E-03 | 3.89E-03 | 2.68                   | 3.93E-03 | 4.00E-03 | 2.89   | 3.68E-03 | 3.82E-03 | 2.36    | 3.29E-03 | 4.62E-03 |
|                                | below |         | 1.68E-03 | 4.55E-03 |                        | 1.47E-03 | 2.72E-03 |        | 1.27E-03 | 2.86E-03 |         | 1.40E-03 | 3.30E-03 |
| <i>A-Bifidobacteriales</i>     | above | 1.04    | 8.00E-01 | 2.47E-01 | 1.16                   | 8.40E-01 | 2.60E-01 | 1.07   | 8.23E-01 | 2.70E-01 | 0.85    | 6.48E-01 | 3.72E-01 |
|                                | below |         | 7.72E-01 | 4.70E-01 |                        | 7.26E-01 | 4.76E-01 |        | 7.66E-01 | 4.16E-01 |         | 7.64E-01 | 1.89E-01 |
| <i>A-Coriobacteriales</i>      | above | 2.21    | 6.21E-05 | 3.91E-03 | 0.38                   | 2.07E-05 | 5.33E-04 | 0.27   | 2.07E-05 | 9.10E-04 | 1.90    | 8.10E-05 | 9.17E-03 |
|                                | below |         | 2.81E-05 | 1.06E-03 |                        | 5.45E-05 | 1.77E-02 |        | 7.71E-05 | 5.21E-03 |         | 4.26E-05 | 5.33E-04 |
| <i>B-Bacteroidales</i>         | above | 2.03    | 3.47E-04 | 9.25E-03 | 0.23                   | 8.14E-05 | 6.83E-03 | 1.57   | 3.23E-04 | 2.64E-03 | 0.15    | 1.65E-04 | 1.19E-03 |
|                                | below |         | 1.71E-04 | 2.29E-03 |                        | 3.56E-04 | 3.06E-03 |        | 2.06E-04 | 5.92E-03 |         | 1.12E-03 | 2.44E-02 |
| <i>F-Bacillales</i>            | above | 0.34    | 3.28E-04 | 3.97E-04 | 1.06                   | 4.68E-04 | 9.97E-04 | 0.72   | 4.02E-04 | 7.39E-04 | 0.75    | 3.65E-04 | 9.42E-04 |
|                                | below |         | 9.55E-04 | 2.00E-03 |                        | 4.42E-04 | 7.67E-04 |        | 5.61E-04 | 1.25E-03 |         | 4.85E-04 | 2.05E-03 |

**SUPPLEMENTAL FIGURE 14**

Relative abundance of bacteria in stool of high (above median) and low (below median) vaccine responders. Positive and negative associations are highlighted in blue and orange, respectively; statistical analysis is described in the legend to Supplemental Figure 13. *Esch.*, *Escherichia*; IQR, interquartile range.

|                              |       |      |          |          |                   |          |          |      |          |          |      |          |          |
|------------------------------|-------|------|----------|----------|-------------------|----------|----------|------|----------|----------|------|----------|----------|
| <i>F-Lactobacillales</i>     | above | 0.90 | 7.31E-02 | 7.11E-02 | 1.14              | 8.46E-02 | 1.05E-01 | 1.08 | 8.07E-02 | 8.32E-02 | 1.37 | 8.15E-02 | 2.64E-01 |
|                              | below |      | 8.17E-02 | 2.66E-01 |                   | 7.39E-02 | 1.19E-01 |      | 7.48E-02 | 1.27E-01 |      | 5.95E-02 | 9.21E-02 |
| <i>F-Clostridiales</i>       | above | 0.88 | 2.17E-03 | 5.82E-03 | 0.40              | 1.24E-03 | 1.16E-02 | 0.57 | 1.95E-03 | 1.85E-02 | 0.24 | 1.05E-03 | 3.33E-03 |
|                              | below |      | 2.46E-03 | 2.25E-02 |                   | 3.13E-03 | 1.43E-02 |      | 3.41E-03 | 5.98E-03 |      | 4.38E-03 | 1.58E-02 |
| <i>P-Burkholderiales</i>     | above | -    | 0.00E+00 | 1.85E-05 | -                 | 0.00E+00 | 0.00E+00 | -    | 0.00E+00 | 1.85E-05 | -    | 0.00E+00 | 1.85E-05 |
|                              | below |      | 0.00E+00 | 2.34E-05 |                   | 0.00E+00 | 3.93E-05 |      | 0.00E+00 | 2.34E-05 |      | 0.00E+00 | 1.42E-05 |
| <i>P-Campylobacteriales</i>  | above | -    | 0.00E+00 | 9.77E-05 | -                 | 0.00E+00 | 3.94E-05 | -    | 0.00E+00 | 4.40E-05 | -    | 6.34E-06 | 1.60E-02 |
|                              | below |      | 0.00E+00 | 1.62E-05 |                   | 0.00E+00 | 2.83E-05 |      | 0.00E+00 | 1.93E-05 |      | 0.00E+00 | 1.47E-05 |
| <i>P-Enterobacteriales</i>   | above | 0.84 | 3.33E-02 | 1.37E-01 | 0.44              | 2.67E-02 | 5.83E-02 | 1.21 | 3.22E-02 | 6.46E-02 | 0.53 | 1.54E-02 | 1.37E-01 |
|                              | below |      | 3.98E-02 | 1.27E-01 |                   | 6.03E-02 | 1.91E-01 |      | 2.67E-02 | 1.41E-01 |      | 2.89E-02 | 1.67E-01 |
| <i>P-Pasteurellales</i>      | above | -    | 0.00E+00 | 2.23E-05 | -                 | 0.00E+00 | 2.07E-05 | -    | 0.00E+00 | 2.23E-05 | -    | 0.00E+00 | 4.87E-05 |
|                              | below |      | 0.00E+00 | 0.00E+00 |                   | 0.00E+00 | 1.57E-05 |      | 0.00E+00 | 0.00E+00 |      | 0.00E+00 | 0.00E+00 |
| <i>P-Pseudomonadales</i>     | above | 0.80 | 5.05E-05 | 7.72E-05 | 0.77              | 4.65E-05 | 2.33E-04 | 1.27 | 6.29E-05 | 2.30E-04 | 1.46 | 6.54E-05 | 2.30E-04 |
|                              | below |      | 6.29E-05 | 2.13E-04 |                   | 6.07E-05 | 8.13E-05 |      | 4.94E-05 | 1.28E-04 |      | 4.47E-05 | 6.18E-05 |
| <b>Family</b>                |       |      |          |          |                   |          |          |      |          |          |      |          |          |
| <i>A-Actinomycetaceae</i>    | above | -    | 0.00E+00 | 8.13E-05 | -                 | 0.00E+00 | 1.56E-04 | -    | 0.00E+00 | 2.20E-04 | 0.00 | 0.00E+00 | 1.39E-05 |
|                              | below |      | 0.00E+00 | 6.77E-05 |                   | 0.00E+00 | 5.36E-05 |      | 0.00E+00 | 3.61E-05 |      | 2.99E-05 | 1.47E-04 |
| <i>A-Corynebacteriaceae</i>  | above | 0.60 | 5.72E-05 | 1.10E-04 | 0.97              | 7.09E-05 | 1.19E-04 | 0.78 | 6.71E-05 | 1.12E-04 | 1.22 | 8.20E-05 | 8.46E-05 |
|                              | below |      | 9.55E-05 | 1.26E-04 |                   | 7.31E-05 | 1.03E-04 |      | 8.64E-05 | 1.10E-04 |      | 6.71E-05 | 1.28E-04 |
| <i>A-Micrococcaceae</i>      | above | 1.51 | 1.59E-03 | 2.49E-03 | 2.83              | 2.63E-03 | 2.73E-03 | 2.47 | 2.13E-03 | 2.61E-03 | 2.57 | 2.22E-03 | 3.26E-03 |
|                              | below |      | 1.06E-03 | 2.38E-03 |                   | 9.30E-04 | 1.24E-03 |      | 8.63E-04 | 1.58E-03 |      | 8.63E-04 | 1.98E-03 |
| <i>A-Bifidobacteriaceae</i>  | above | 1.04 | 8.00E-01 | 2.47E-01 | 1.16              | 8.40E-01 | 2.60E-01 | 1.07 | 8.23E-01 | 2.70E-01 | 0.85 | 6.48E-01 | 3.72E-01 |
|                              | below |      | 7.72E-01 | 4.70E-01 |                   | 7.26E-01 | 4.76E-01 |      | 7.66E-01 | 4.16E-01 |      | 7.64E-01 | 1.89E-01 |
| <i>A-Coriobacteriaceae</i>   | above | 2.21 | 6.21E-05 | 3.91E-03 | 0.38              | 2.07E-05 | 5.33E-04 | 0.27 | 2.07E-05 | 9.10E-04 | 1.90 | 8.10E-05 | 9.17E-03 |
|                              | below |      | 2.81E-05 | 1.06E-03 |                   | 5.45E-05 | 1.77E-02 |      | 7.71E-05 | 5.21E-03 |      | 4.26E-05 | 5.33E-04 |
| <i>B-Bacteroidaceae</i>      | above | 0.54 | 2.87E-05 | 6.28E-04 | 0.23              | 2.23E-05 | 6.08E-04 | 0.27 | 2.23E-05 | 1.17E-03 | 1.25 | 5.62E-05 | 5.86E-04 |
|                              | below |      | 5.33E-05 | 8.27E-04 |                   | 9.70E-05 | 9.87E-04 |      | 8.14E-05 | 6.08E-04 |      | 4.48E-05 | 8.27E-04 |
| <i>B-Porphyrromonadaceae</i> | above | -    | 0.00E+00 | 5.61E-05 | 0.00              | 0.00E+00 | 1.18E-04 | 0.00 | 0.00E+00 | 9.77E-05 | -    | 0.00E+00 | 2.05E-05 |
|                              | below |      | 0.00E+00 | 8.78E-05 |                   | 8.25E-06 | 7.20E-05 |      | 1.65E-05 | 5.61E-05 |      | 0.00E+00 | 2.76E-04 |
| <i>B-Prevotellaceae</i>      | above | -    | 0.00E+00 | 3.64E-05 | 0.34 <sup>a</sup> | 0.00E+00 | 0.00E+00 | -    | 0.00E+00 | 3.61E-05 | -    | 0.00E+00 | 3.61E-05 |
|                              | below |      | 0.00E+00 | 1.27E-05 |                   | 0.00E+00 | 6.10E-05 |      | 0.00E+00 | 1.27E-05 |      | 0.00E+00 | 1.45E-05 |
| <i>F-Staphylococcaceae</i>   | above | 0.28 | 1.91E-04 | 3.29E-04 | 1.01              | 3.58E-04 | 5.89E-04 | 0.63 | 2.83E-04 | 5.55E-04 | 0.68 | 2.76E-04 | 5.80E-04 |
|                              | below |      | 6.82E-04 | 1.40E-03 |                   | 3.55E-04 | 6.00E-04 |      | 4.49E-04 | 9.19E-04 |      | 4.05E-04 | 1.45E-03 |
| <i>F-Camobacteriaceae</i>    | above | 0.89 | 3.71E-05 | 1.54E-04 | 0.26              | 1.85E-05 | 7.62E-05 | 0.39 | 2.09E-05 | 1.64E-04 | 0.08 | 9.25E-06 | 7.61E-05 |
|                              | below |      | 4.16E-05 | 8.64E-05 |                   | 7.10E-05 | 1.40E-04 |      | 5.42E-05 | 9.35E-05 |      | 1.13E-04 | 1.61E-04 |
| <i>F-Enterococcaceae</i>     | above | 0.95 | 2.56E-04 | 2.52E-03 | 0.34              | 1.35E-04 | 2.06E-03 | 1.20 | 3.13E-04 | 1.43E-03 | 0.06 | 8.64E-05 | 4.77E-04 |
|                              | below |      | 2.69E-04 | 7.27E-04 |                   | 3.92E-04 | 2.05E-03 |      | 2.60E-04 | 2.76E-03 |      | 1.45E-03 | 5.35E-03 |
| <i>F-Lactobacillaceae</i>    | above | 0.31 | 5.12E-05 | 7.36E-04 | 8.95              | 7.36E-04 | 5.06E-03 | 0.73 | 1.20E-04 | 5.05E-03 | 1.86 | 3.14E-04 | 1.88E-03 |
|                              | below |      | 1.65E-04 | 4.32E-03 |                   | 8.23E-05 | 3.01E-04 |      | 1.64E-04 | 7.36E-04 |      | 1.69E-04 | 7.81E-03 |
| <i>F-Streptococcaceae</i>    | above | 1.09 | 4.85E-02 | 5.10E-02 | 1.07              | 4.69E-02 | 6.47E-02 | 1.17 | 4.77E-02 | 5.63E-02 | 1.41 | 5.05E-02 | 9.41E-02 |
|                              | below |      | 4.47E-02 | 1.09E-01 |                   | 4.37E-02 | 6.95E-02 |      | 4.09E-02 | 9.46E-02 |      | 3.57E-02 | 5.19E-02 |

**SUPPLEMENTAL FIGURE 14**

Continued.



|                              |       |      |          |          |                   |          |          |                   |          |          |      |          |          |
|------------------------------|-------|------|----------|----------|-------------------|----------|----------|-------------------|----------|----------|------|----------|----------|
| <i>F-Clostridiaceae</i>      | above | 0.00 | 0.00E+00 | 1.81E-04 | 1.05              | 1.85E-05 | 2.39E-04 | 1.23              | 1.85E-05 | 4.72E-04 | 0.05 | 9.25E-06 | 7.61E-05 |
|                              | below |      | 5.96E-05 | 1.35E-03 |                   | 1.77E-05 | 3.77E-04 |                   | 1.50E-05 | 1.90E-04 |      | 1.90E-04 | 1.35E-03 |
| <i>F-XI (Incertae Sedis)</i> | above | 1.23 | 3.74E-05 | 1.81E-04 | 0.00              | 0.00E+00 | 8.91E-05 | 0.67              | 2.93E-05 | 2.00E-04 | 0.60 | 4.05E-05 | 1.95E-04 |
|                              | below |      | 3.04E-05 | 1.14E-04 |                   | 6.55E-05 | 2.11E-04 |                   | 4.39E-05 | 1.14E-04 |      | 6.77E-05 | 1.86E-04 |
| <i>F-Lachnospiraceae</i>     | above | -    | 0.00E+00 | 2.07E-05 | -                 | 0.00E+00 | 1.50E-05 | -                 | 0.00E+00 | 2.07E-05 | 0.00 | 0.00E+00 | 0.00E+00 |
|                              | below |      | 0.00E+00 | 1.50E-05 |                   | 0.00E+00 | 1.14E-04 |                   | 0.00E+00 | 9.25E-05 |      | 1.47E-05 | 1.09E-03 |
| <i>F-Veillonellaceae</i>     | above | 0.83 | 7.88E-04 | 1.86E-03 | 0.41              | 4.59E-04 | 1.96E-03 | 1.77              | 8.15E-04 | 1.68E-03 | 0.84 | 6.37E-04 | 1.98E-03 |
|                              | below |      | 9.45E-04 | 2.08E-03 |                   | 1.11E-03 | 3.76E-03 |                   | 4.61E-04 | 1.95E-03 |      | 7.62E-04 | 2.04E-03 |
| <i>P-Campylobacteraceae</i>  | above | -    | 0.00E+00 | 9.77E-05 | -                 | 0.00E+00 | 3.94E-05 | -                 | 0.00E+00 | 4.40E-05 | -    | 6.35E-06 | 1.60E-02 |
|                              | below |      | 0.00E+00 | 1.62E-05 |                   | 0.00E+00 | 2.83E-05 |                   | 0.00E+00 | 1.93E-05 |      | 0.00E+00 | 1.47E-05 |
| <i>P-Enterobacteriaceae</i>  | above | 0.84 | 3.33E-02 | 1.37E-01 | 0.44              | 2.67E-02 | 5.83E-02 | 1.21              | 3.22E-02 | 6.46E-02 | 0.53 | 1.54E-02 | 1.37E-01 |
|                              | below |      | 3.98E-02 | 1.27E-01 |                   | 6.03E-02 | 1.91E-01 |                   | 2.67E-02 | 1.41E-01 |      | 2.89E-02 | 1.67E-01 |
| <i>P-Pasteurellaceae</i>     | above | -    | 0.00E+00 | 2.23E-05 | -                 | 0.00E+00 | 2.07E-05 | -                 | 0.00E+00 | 2.23E-05 | -    | 0.00E+00 | 4.87E-05 |
|                              | below |      | 0.00E+00 | 0.00E+00 |                   | 0.00E+00 | 1.58E-05 |                   | 0.00E+00 | 0.00E+00 |      | 0.00E+00 | 0.00E+00 |
| <i>P-Moraxellaceae</i>       | above | 0.81 | 3.60E-05 | 7.12E-05 | 0.78              | 3.45E-05 | 2.50E-04 | 0.79              | 3.45E-05 | 2.05E-04 | 1.60 | 4.63E-05 | 2.09E-04 |
|                              | below |      | 4.46E-05 | 2.29E-04 |                   | 4.44E-05 | 1.01E-04 |                   | 4.39E-05 | 1.38E-04 |      | 2.90E-05 | 5.30E-05 |
| <i>P-Pseudomonadaceae</i>    | above | -    | 1.36E-05 | 2.07E-05 | -                 | 1.39E-05 | 2.07E-05 | -                 | 1.47E-05 | 2.23E-05 | 0.49 | 6.95E-06 | 2.23E-05 |
|                              | below |      | 0.00E+00 | 1.49E-05 |                   | 0.00E+00 | 2.15E-05 |                   | 0.00E+00 | 1.46E-05 |      | 1.42E-05 | 2.07E-05 |
| <b>Genus</b>                 |       |      |          |          |                   |          |          |                   |          |          |      |          |          |
| <i>A-Actinomyces</i>         | above | -    | 0.00E+00 | 6.10E-05 | -                 | 0.00E+00 | 1.47E-04 | 14.1 <sup>a</sup> | 0.00E+00 | 2.20E-04 | -    | 0.00E+00 | 0.00E+00 |
|                              | below |      | 0.00E+00 | 6.77E-05 |                   | 0.00E+00 | 3.68E-05 |                   | 0.00E+00 | 0.00E+00 |      | 0.00E+00 | 1.11E-04 |
| <i>A-Corynebacterium</i>     | above | 0.60 | 5.72E-05 | 1.10E-04 | 0.97              | 7.09E-05 | 1.19E-04 | 0.78              | 6.71E-05 | 1.12E-04 | 1.22 | 8.19E-05 | 8.47E-05 |
|                              | below |      | 9.55E-05 | 1.26E-04 |                   | 7.31E-05 | 1.10E-04 |                   | 8.64E-05 | 1.17E-04 |      | 6.71E-05 | 1.41E-04 |
| <i>A-Rothia</i>              | above | 1.51 | 1.56E-03 | 2.35E-03 | 2.71              | 2.48E-03 | 2.55E-03 | 2.54              | 2.13E-03 | 2.54E-03 | 2.56 | 2.14E-03 | 2.98E-03 |
|                              | below |      | 1.03E-03 | 2.38E-03 |                   | 9.14E-04 | 1.19E-03 |                   | 8.38E-04 | 1.49E-03 |      | 8.38E-04 | 1.94E-03 |
| <i>A-Bifidobacterium</i>     | above | 1.04 | 6.80E-01 | 1.57E-01 | 1.13              | 7.08E-01 | 1.85E-01 | 1.04              | 6.87E-01 | 2.45E-01 | 0.87 | 5.74E-01 | 3.07E-01 |
|                              | below |      | 6.53E-01 | 3.96E-01 |                   | 6.25E-01 | 3.93E-01 |                   | 6.63E-01 | 3.35E-01 |      | 6.63E-01 | 1.24E-01 |
| <i>A-Collinsella</i>         | above | -    | 1.88E-05 | 2.48E-03 | 0.00              | 0.00E+00 | 3.80E-05 | 0.00              | 0.00E+00 | 1.32E-04 | -    | 2.12E-05 | 3.41E-03 |
|                              | below |      | 0.00E+00 | 1.32E-04 |                   | 2.54E-05 | 2.51E-03 |                   | 1.69E-05 | 2.55E-03 |      | 0.00E+00 | 9.02E-05 |
| <i>B-Bacteroides</i>         | above | 0.54 | 2.87E-05 | 6.28E-04 | 0.23              | 2.23E-05 | 6.08E-04 | 0.27              | 2.23E-05 | 1.17E-03 | 1.25 | 5.62E-05 | 5.86E-04 |
|                              | below |      | 5.33E-05 | 8.27E-04 |                   | 9.70E-05 | 9.87E-04 |                   | 8.14E-05 | 6.08E-04 |      | 4.48E-05 | 8.27E-04 |
| <i>B-Parabacteroides</i>     | above | -    | 0.00E+00 | 5.61E-05 | -                 | 0.00E+00 | 4.44E-05 | -                 | 0.00E+00 | 9.77E-05 | -    | 0.00E+00 | 0.00E+00 |
|                              | below |      | 0.00E+00 | 4.44E-05 |                   | 0.00E+00 | 7.20E-05 |                   | 0.00E+00 | 4.44E-05 |      | 0.00E+00 | 4.44E-05 |
| <i>B-Prevotella</i>          | above | -    | 0.00E+00 | 1.87E-05 | 0.34 <sup>a</sup> | 0.00E+00 | 0.00E+00 | -                 | 0.00E+00 | 3.61E-05 | -    | 0.00E+00 | 3.61E-05 |
|                              | below |      | 0.00E+00 | 1.27E-05 |                   | 0.00E+00 | 4.25E-05 |                   | 0.00E+00 | 1.27E-05 |      | 0.00E+00 | 1.45E-05 |
| <i>F-Gemella</i>             | above | 2.49 | 4.27E-05 | 8.95E-05 | 1.30              | 2.23E-05 | 5.56E-05 | 2.53              | 4.10E-05 | 1.03E-04 | 0.77 | 1.71E-05 | 4.65E-05 |
|                              | below |      | 1.71E-05 | 6.29E-05 |                   | 1.71E-05 | 1.07E-04 |                   | 1.62E-05 | 7.48E-05 |      | 2.22E-05 | 7.48E-05 |
| <i>F-Staphylococcus</i>      | above | 0.29 | 1.21E-04 | 2.02E-04 | 0.84              | 1.25E-04 | 5.12E-04 | 0.44              | 1.23E-04 | 3.07E-04 | 1.65 | 2.09E-04 | 5.48E-04 |
|                              | below |      | 4.16E-04 | 1.10E-03 |                   | 1.50E-04 | 5.72E-04 |                   | 2.81E-04 | 6.45E-04 |      | 1.27E-04 | 9.59E-04 |
| <i>F-Dolosigranulum</i>      | above | 0.00 | 0.00E+00 | 1.85E-05 | 0.00              | 0.00E+00 | 5.08E-05 | 0.00              | 0.00E+00 | 5.87E-05 | 0.00 | 0.00E+00 | 4.65E-05 |
|                              | below |      | 2.40E-05 | 6.68E-05 |                   | 1.57E-05 | 3.26E-05 |                   | 1.50E-05 | 4.65E-05 |      | 1.82E-05 | 5.87E-05 |

**SUPPLEMENTAL FIGURE 14**

Continued.

|                         |       |      |          |          |                   |          |          |      |          |          |      |          |          |
|-------------------------|-------|------|----------|----------|-------------------|----------|----------|------|----------|----------|------|----------|----------|
| <i>F-Enterococcus</i>   | above | 0.97 | 3.94E-05 | 6.85E-04 | 0.00              | 0.00E+00 | 2.36E-04 | 1.70 | 4.89E-05 | 5.06E-04 | 0.00 | 0.00E+00 | 6.49E-05 |
|                         | below |      | 4.07E-05 | 1.55E-04 |                   | 5.01E-05 | 5.52E-04 |      | 2.88E-05 | 6.23E-04 |      | 6.61E-05 | 9.27E-04 |
| <i>F-Lactobacillus</i>  | above | 0.15 | 1.02E-05 | 2.22E-04 | 4.90              | 1.02E-04 | 1.24E-03 | 0.45 | 2.03E-05 | 7.44E-04 | -    | 7.20E-05 | 9.77E-04 |
|                         | below |      | 6.88E-05 | 1.04E-03 |                   | 2.07E-05 | 1.16E-04 |      | 4.47E-05 | 1.44E-04 |      | 0.00E+00 | 1.04E-03 |
| <i>F-Lactococcus</i>    | above | 0.93 | 1.78E-04 | 7.61E-05 | 1.06              | 1.87E-04 | 7.75E-05 | 0.96 | 1.87E-04 | 4.23E-05 | 1.00 | 1.95E-04 | 5.27E-05 |
|                         | below |      | 1.92E-04 | 2.13E-04 |                   | 1.77E-04 | 1.18E-04 |      | 1.95E-04 | 2.25E-04 |      | 1.96E-04 | 2.10E-04 |
| <i>F-Streptococcus</i>  | above | 1.22 | 4.64E-02 | 4.90E-02 | 1.15              | 4.33E-02 | 6.25E-02 | 1.20 | 4.45E-02 | 5.24E-02 | 3.27 | 4.76E-02 | 7.87E-02 |
|                         | below |      | 3.79E-02 | 9.13E-02 |                   | 3.77E-02 | 4.24E-02 |      | 3.71E-02 | 4.90E-02 |      | 1.46E-02 | 4.28E-02 |
| <i>F-Clostridium</i>    | above | -    | 0.00E+00 | 1.85E-05 | -                 | 0.00E+00 | 3.26E-05 | -    | 0.00E+00 | 5.45E-05 | -    | 0.00E+00 | 2.54E-05 |
|                         | below |      | 0.00E+00 | 2.39E-04 |                   | 0.00E+00 | 1.42E-04 |      | 0.00E+00 | 1.15E-04 |      | 0.00E+00 | 3.08E-04 |
| <i>F-Anaerococcus</i>   | above | 0.00 | 0.00E+00 | 5.98E-05 | 0.00              | 0.00E+00 | 4.40E-05 | 0.00 | 0.00E+00 | 8.91E-05 | 0.00 | 0.00E+00 | 6.96E-05 |
|                         | below |      | 7.10E-06 | 8.91E-05 |                   | 3.02E-05 | 1.04E-04 |      | 1.81E-05 | 5.98E-05 |      | 4.22E-05 | 1.05E-04 |
| <i>F-Finegoldia</i>     | above | -    | 0.00E+00 | 1.82E-05 | 0.00              | 0.00E+00 | 0.00E+00 | -    | 0.00E+00 | 1.82E-05 | -    | 0.00E+00 | 2.05E-05 |
|                         | below |      | 0.00E+00 | 1.62E-05 |                   | 7.25E-06 | 5.87E-05 |      | 0.00E+00 | 2.11E-05 |      | 0.00E+00 | 2.11E-05 |
| <i>F-Peptoniphilus</i>  | above | -    | 0.00E+00 | 4.49E-05 | 0.00              | 0.00E+00 | 1.97E-05 | -    | 0.00E+00 | 7.71E-05 | 0.00 | 0.00E+00 | 8.35E-05 |
|                         | below |      | 0.00E+00 | 7.23E-05 |                   | 2.35E-05 | 7.92E-05 |      | 0.00E+00 | 4.87E-05 |      | 2.26E-05 | 1.05E-04 |
| <i>F-Megasphaera</i>    | above | -    | 0.00E+00 | 0.00E+00 | 0.83 <sup>a</sup> | 0.00E+00 | 0.00E+00 | -    | 0.00E+00 | 9.12E-04 | -    | 0.00E+00 | 0.00E+00 |
|                         | below |      | 0.00E+00 | 3.61E-05 |                   | 0.00E+00 | 9.35E-04 |      | 0.00E+00 | 0.00E+00 |      | 0.00E+00 | 1.32E-05 |
| <i>F-Veillonella</i>    | above | 6.16 | 2.22E-04 | 8.36E-04 | 0.58              | 7.88E-05 | 6.81E-04 | 0.25 | 6.22E-05 | 4.96E-04 | 0.37 | 5.01E-05 | 8.99E-04 |
|                         | below |      | 3.60E-05 | 2.46E-04 |                   | 1.35E-04 | 5.33E-04 |      | 2.45E-04 | 9.23E-04 |      | 1.35E-04 | 4.71E-04 |
| <i>P-Campylobacter</i>  | above | -    | 0.00E+00 | 9.77E-05 | -                 | 0.00E+00 | 3.94E-05 | -    | 0.00E+00 | 4.40E-05 | -    | 6.34E-06 | 1.60E-02 |
|                         | below |      | 0.00E+00 | 1.62E-05 |                   | 0.00E+00 | 2.83E-05 |      | 0.00E+00 | 1.93E-05 |      | 0.00E+00 | 1.47E-05 |
| <i>P-Esch./Shigella</i> | above | 0.98 | 1.51E-02 | 3.78E-02 | 0.74              | 1.47E-02 | 3.54E-02 | 1.43 | 1.61E-02 | 3.78E-02 | 0.25 | 4.08E-03 | 3.69E-02 |
|                         | below |      | 1.54E-02 | 5.10E-02 |                   | 1.97E-02 | 6.45E-02 |      | 1.13E-02 | 4.42E-02 |      | 1.61E-02 | 4.75E-02 |
| <i>P-Acinetobacter</i>  | above | 0.67 | 2.95E-05 | 7.12E-05 | 1.00              | 3.45E-05 | 2.09E-04 | 0.84 | 3.15E-05 | 1.14E-04 | 1.62 | 3.42E-05 | 2.09E-04 |
|                         | below |      | 4.42E-05 | 1.34E-04 |                   | 3.44E-05 | 5.65E-05 |      | 3.74E-05 | 7.29E-05 |      | 2.11E-05 | 3.02E-05 |

<sup>a</sup>Ratio calculated with means as median values were both zero.

#### SUPPLEMENTAL FIGURE 14

Continued.

**SUPPLEMENTAL TABLE 3** Schedule of Study Procedures

| Procedure                                              | Age of Infant      |                       |                    |                  |                    |                         |
|--------------------------------------------------------|--------------------|-----------------------|--------------------|------------------|--------------------|-------------------------|
|                                                        | Birth <sup>a</sup> | 6 Weeks               | 10 Weeks           | 11 Weeks         | 14 Weeks           | 15 Weeks                |
| Anthropometry                                          | Weight, length     | Weight, length        | Weight, length     |                  |                    | Weight, length          |
| Ultrasound                                             |                    | TI                    |                    | TI               |                    | TI                      |
| Vaccination                                            | BCG, OPV           | HBV, Hib, DPT, OPV    | HBV, Hib, DPT, OPV |                  | HBV, Hib, DPT, OPV |                         |
| Blood cell counts                                      |                    | CBC, FACS for T cells |                    |                  |                    | CBC, FACS for T cells   |
| Vaccine-specific memory T cells                        |                    |                       |                    |                  |                    | PPD, OPV, HBV, TT (SEB) |
| BCG vaccine response                                   |                    |                       |                    |                  |                    | DTH skin test to PPD    |
| Antibody in lymphocyte supernatant assay               |                    |                       |                    |                  |                    | TT IgG                  |
| 16S rRNA gene sequence, PCR for <i>Bifidobacterium</i> |                    | Stool microbiota      |                    | Stool microbiota |                    | Stool microbiota        |

CBC, complete blood count; FACS, fluorescence-activated cell sorter; Hib, *Haemophilus influenzae* type b.

<sup>a</sup> Vaccines administered within 48 hours of birth.

**SUPPLEMENTAL TABLE 4** Primers and Probes Used for *Bifidobacterium*-Specific PCR Assays

| Primer/Probe | Taxonomy              | Sequence (5' to 3')                   | Temperature (C°) | Reference                   |
|--------------|-----------------------|---------------------------------------|------------------|-----------------------------|
| Uni334F      | Bacteria              | ACTCCTACGGGAGGCAGCAGT                 | 65.5             | Hartman et al <sup>55</sup> |
| Uni514R      | Bacteria              | ATTACCGCGGCTGCTGGC                    | 65.5             | Hartman et al <sup>55</sup> |
| Bif F        | Bifidobacteria        | GCGTGCTTAACACATGCAAGTC                | 60               | Penders et al <sup>56</sup> |
| Bif R        | Bifidobacteria        | CACCCGTTCCAGGAGCTATT                  | 60               | Penders et al <sup>56</sup> |
| Bif P        | Bifidobacteria        | [6-FAM]TCACGCATTACTCACCCGTTGCC[TAMRA] | 60               | Penders et al <sup>56</sup> |
| FWD_BL_BI    | <i>B longum</i> group | [HEX]-AAAACGTCCATCCATCAC              | 54               | Present study               |
| REV_BL       | <i>B longum</i> group | ACGACCAGGTTCCACTTGAT                  | 54               | Present study               |
| REV_BI       | <i>B longum</i> group | CGCCTCAGTCTTTAATGT                    | 54               | Present study               |
| NBIF389      | Bifidobacteria        | [HEX]-GCCTTCGGGTTGTAAAC               | 52               | Lewis et al <sup>24</sup>   |
| NBIF1018REV  | Bifidobacteria        | GACCATGCACCACCTGTG                    | 52               | Lewis et al <sup>24</sup>   |

**SUPPLEMENTAL TABLE 5** Number and Percentage of Stool Samples Positive for the Indicated Bacterial Phyla by 16S rDNA Sequence Analysis in 48 Subjects

| Age      | <i>Actinobacteria</i> | <i>Proteobacteria</i> | <i>Firmicutes</i> | <i>Bacteroidetes</i> | <i>Tenericutes</i> | <i>Fusobacteria</i> | <i>Verrucomicrobia</i> |
|----------|-----------------------|-----------------------|-------------------|----------------------|--------------------|---------------------|------------------------|
| 6 weeks  |                       |                       |                   |                      |                    |                     |                        |
| <i>n</i> | 48                    | 47                    | 48                | 23                   | 6                  | 3                   | 4                      |
| %        | 100                   | 97.9                  | 100               | 47.9                 | 12.5               | 6.2                 | 8.3                    |
| 11 weeks |                       |                       |                   |                      |                    |                     |                        |
| <i>n</i> | 48                    | 47                    | 48                | 30                   | 10                 | 4                   | 2                      |
| %        | 100                   | 97.9                  | 100               | 62.5                 | 20.8               | 8.3                 | 4.2                    |
| 15 weeks |                       |                       |                   |                      |                    |                     |                        |
| <i>n</i> | 48                    | 48                    | 48                | 34                   | 8                  | 3                   | 2                      |
| %        | 100                   | 100                   | 100               | 70.8                 | 16.7               | 6.2                 | 4.2                    |

**SUPPLEMENTAL TABLE 6** Relative Abundance of Bacterial Phyla Determined by 16S rDNA Sequence Analysis in 48 Subjects

|                       | 6 Weeks |       |                      | 11 Weeks             |       |                      | 15 Weeks             |       |                      | ANOVA<br><i>P</i> | Pairwise ( <i>P</i> < .05) |               |                |
|-----------------------|---------|-------|----------------------|----------------------|-------|----------------------|----------------------|-------|----------------------|-------------------|----------------------------|---------------|----------------|
|                       | Median  | 25%   | 75%                  | Median               | 25%   | 75%                  | Median               | 25%   | 75%                  |                   | 6 vs<br>11 wk              | 6 vs<br>15 wk | 11 vs<br>15 wk |
| <i>Actinobacteria</i> | 0.923   | 0.774 | 0.963                | 0.874                | 0.723 | 0.947                | 0.861                | 0.638 | 0.944                | .305              |                            |               |                |
| <i>Proteobacteria</i> | 0.006   | 0.001 | 0.064                | 0.026                | 0.005 | 0.112                | 0.027                | 0.003 | 0.125                | .025              | Yes                        |               |                |
| <i>Firmicutes</i>     | 0.043   | 0.017 | 0.117                | 0.069                | 0.024 | 0.153                | 0.057                | 0.030 | 0.126                | .560              |                            |               |                |
| <i>Bacteroidetes</i>  | 0       | 0     | $1.8 \times 10^{-4}$ | $6.0 \times 10^{-5}$ | 0     | $1.7 \times 10^{-3}$ | $1.2 \times 10^{-4}$ | 0     | $4.1 \times 10^{-3}$ | .002              |                            | Yes           |                |

**SUPPLEMENTAL TABLE 7** Diversity by Week as Indicated by Richness (OTU) and SDI

|        | 6 Weeks<br>( <i>n</i> = 48) |       | 11 Weeks<br>( <i>n</i> = 48) |       | 15 Weeks<br>( <i>n</i> = 48) |       | ANOVA<br><i>P</i> | Pairwise ( <i>P</i> < .05) |               |                |
|--------|-----------------------------|-------|------------------------------|-------|------------------------------|-------|-------------------|----------------------------|---------------|----------------|
|        | Mean                        | SD    | Mean                         | SD    | Mean                         | SD    |                   | 6 vs<br>11 wk              | 6 vs<br>15 wk | 11 vs<br>15 wk |
| Phylum |                             |       |                              |       |                              |       |                   |                            |               |                |
| OTU    | 4.146                       | 1.091 | 4.271                        | 0.984 | 4.396                        | 0.917 | 0.239             |                            |               |                |
| SDI    | 0.385                       | 0.287 | 0.464                        | 0.275 | 0.506                        | 0.293 | 0.018             |                            | Yes           |                |
| Class  |                             |       |                              |       |                              |       |                   |                            |               |                |
| OTU    | 5.333                       | 1.589 | 5.625                        | 1.496 | 5.854                        | 1.288 | 0.056             |                            |               |                |
| SDI    | 0.395                       | 0.303 | 0.493                        | 0.308 | 0.541                        | 0.333 | 0.008             |                            | Yes           |                |
| Order  |                             |       |                              |       |                              |       |                   |                            |               |                |
| OTU    | 8.229                       | 2.106 | 8.771                        | 2.176 | 9.354                        | 1.768 | 0.002             |                            | Yes           |                |
| SDI    | 0.456                       | 0.322 | 0.54                         | 0.334 | 0.586                        | 0.347 | 0.030             |                            | Yes           |                |

OTU, operational taxonomic unit; SDI, Shannon Diversity Index.

**SUPPLEMENTAL TABLE 8** Mean Relative Abundance of Stool Microbiota Identified in >25% of Samples as Determined by DNA Sequence Analysis of the V4 Region of the 16S rRNA Gene at 15 Weeks of Age

| Phylum             | Relative Abundance | Class               | Relative Abundance | Order              | Relative Abundance  | Family          | Relative Abundance | Genus         | Relative Abundance |      |         |               |         |
|--------------------|--------------------|---------------------|--------------------|--------------------|---------------------|-----------------|--------------------|---------------|--------------------|------|---------|---------------|---------|
| Actinobacteria     | 0.71353            | Actinobacteria      | 0.71353            | Actinomycetales    | Actinomycetaceae    | 0.00014         | Actinomycetes      | 0.00008       |                    |      |         |               |         |
|                    |                    |                     |                    |                    | Corynebacteriaceae  | 0.00009         | Corynebacterium    | 0.00009       |                    |      |         |               |         |
|                    |                    |                     |                    |                    | Micrococcaceae      | 0.00232         | Rothia             | 0.00224       |                    |      |         |               |         |
|                    |                    |                     |                    |                    | Bifidobacteriaceae  | 0.70127         | Bifidobacterium    | 0.59627       |                    |      |         |               |         |
| Bacteroidetes      | 0.01250            | Bacteroidia         | 0.01248            | Coriobacteriales   | 0.00786             | Collinsella     | 0.00547            |               |                    |      |         |               |         |
|                    |                    |                     |                    | Bacteroidales      | 0.01037             | Bacteroides     | 0.01037            |               |                    |      |         |               |         |
|                    |                    |                     |                    | Porphyromonadaceae | 0.00123             | Parabacteroides | 0.00022            |               |                    |      |         |               |         |
|                    |                    |                     |                    | Prevotellaceae     | 0.00079             | Prevotella      | 0.00079            |               |                    |      |         |               |         |
| Firmicutes         | 0.14731            | Bacilli             | 0.13146            | Bacillales         | 0.00086             | Gemella         | 0.00010            |               |                    |      |         |               |         |
|                    |                    |                     |                    | Lactobacillales    | Staphylococcaceae   | 0.00064         | Staphylococcus     | 0.00047       |                    |      |         |               |         |
|                    |                    |                     |                    |                    | Carnobacteriaceae   | 0.00007         | Dolosigranulum     | 0.00003       |                    |      |         |               |         |
|                    |                    |                     |                    |                    | Enterococcaceae     | 0.00277         | Enterococcus       | 0.00032       |                    |      |         |               |         |
|                    |                    |                     |                    | Clostridiales      | Lactobacillaceae    | 0.01223         | Lactobacillus      | 0.01044       |                    |      |         |               |         |
|                    |                    |                     |                    |                    | Streptococcaceae    | 0.07264         | Lactococcus        | 0.00241       |                    |      |         |               |         |
|                    |                    |                     |                    |                    | Clostridiaceae      | 0.00372         | Streptococcus      | 0.06312       |                    |      |         |               |         |
|                    |                    |                     |                    |                    | XI (Incertae Sedis) | 0.00013         | Clostridium        | 0.00159       |                    |      |         |               |         |
|                    |                    |                     |                    | Proteobacteria     | 0.12227             | αProteobacteria | 0.01014            | Clostridiales | 0.01013            | None | 0.00070 | Peptoniphilus | 0.00003 |
|                    |                    |                     |                    |                    |                     |                 |                    |               |                    | None | 0.00390 | (none)        | 0.00004 |
| Lachnospiraceae    | 0.00070            | Megasphaera         | 0.00267            |                    |                     |                 |                    |               |                    |      |         |               |         |
| Veillonellaceae    | 0.00390            | Veillonella         | 0.00063            |                    |                     |                 |                    |               |                    |      |         |               |         |
| None               | 0.00010            | None                | 0.00649            |                    |                     |                 |                    |               |                    |      |         |               |         |
| None               | 0.00653            | Campylobacter       | 0.03643            |                    |                     |                 |                    |               |                    |      |         |               |         |
| Burkholderiales    | 0.11162            | Campylobacteriaceae | 0.11162            |                    |                     |                 |                    |               |                    |      |         |               |         |
| Campylobacteriales | 0.00008            | Enterobacteriaceae  | 0.00008            |                    |                     |                 |                    |               |                    |      |         |               |         |
| Enterobacteriales  | 0.00008            | Pasteurellaceae     | 0.00020            |                    |                     |                 |                    |               |                    |      |         |               |         |
| Pasteurellales     | 0.00021            | Moraxellaceae       | 0.00001            |                    |                     |                 |                    |               |                    |      |         |               |         |
| Pseudomonadales    | 0.01745            | Pseudomonadaceae    | 0.06073            |                    |                     |                 |                    |               |                    |      |         |               |         |
| Other/unassigned   | 0.00439            |                     | 0.01033            |                    |                     |                 |                    |               |                    |      |         |               |         |

Each column sums to 1.0.

**SUPPLEMENTAL TABLE 9** Stool Microbiota Levels (Relative Abundance) by BF Status at 15 Weeks of Age

| Microbiota                   | Exclusive BF or BF with Supplemental Water or Juice ( <i>n</i> = 33) |                 |                       | Other BF, Including Supplemental Milk or Formula ( <i>n</i> = 15) |                       |                       | <i>P</i> |
|------------------------------|----------------------------------------------------------------------|-----------------|-----------------------|-------------------------------------------------------------------|-----------------------|-----------------------|----------|
|                              | Median                                                               | 25th Percentile | 75th Percentile       | Median                                                            | 25th Percentile       | 75th Percentile       |          |
| <i>Bacteroidaceae</i>        | $2.64 \times 10^{-5}$                                                | 0               | $14.6 \times 10^{-5}$ | $62.8 \times 10^{-5}$                                             | $8.14 \times 10^{-5}$ | $1010 \times 10^{-5}$ | .0059    |
| <i>Bacteroides</i>           | $2.64 \times 10^{-5}$                                                | 0               | $14.6 \times 10^{-5}$ | $62.8 \times 10^{-5}$                                             | $8.14 \times 10^{-5}$ | $1010 \times 10^{-5}$ | .0059    |
| <i>Enterococcus</i>          | $2.88 \times 10^{-5}$                                                | 0               | $19.9 \times 10^{-5}$ | $23.6 \times 10^{-5}$                                             | 0                     | $76.6 \times 10^{-5}$ | .046     |
| <i>B longum</i> <sup>a</sup> | 0.979                                                                | 0.947           | 1.000                 | 0.888                                                             | 0.477                 | 0.979                 | .011     |

All taxa identified by 16S rRNA gene sequence analysis or *Bifidobacterium*-specific PCR and T-RFLP were compared by using these BF categories, and all significant associations ( $P < .05$  by Wilcoxon rank-sum test) are shown here. The same analysis was performed to compare exclusive ( $n = 22$ ) with nonexclusive BF ( $n = 26$ ) at 15 weeks and only 1 taxon (*Pseudomonadales*) showed a significant ( $P = .037$ ) association (exclusive BF:  $1.44 \times 10^{-5}$ ,  $0/31.5 \times 10^{-5}$ ; nonexclusive BF: 0,  $0/1.47 \times 10^{-5}$ ). BF, breastfeeding.

<sup>a</sup> Relative abundance within the genus *Bifidobacterium*.

**SUPPLEMENTAL TABLE 10** Association of Stool Microbiota With Nutritional Status (Length-For-Age z Score) Assessed by Spearman Correlation Analysis

| Taxon                                                            | <i>n</i> | <i>R</i> | <i>P</i> |
|------------------------------------------------------------------|----------|----------|----------|
| 16S rRNA gene sequence (relative abundance)                      |          |          |          |
| <i>Actinobacteria</i> (phylum)                                   | 48       | 0.348    | .015     |
| <i>Actinobacteria</i> (class)                                    | 48       | 0.348    | .015     |
| <i>Bifidobacteriales</i>                                         | 48       | 0.332    | .021     |
| <i>Bifidobacteriaceae</i>                                        | 48       | 0.332    | .021     |
| <i>Bifidobacterium</i>                                           | 48       | 0.342    | .017     |
| <i>Gammaproteobacteria</i>                                       | 48       | -0.318   | .028     |
| <i>Enterobacteriales</i>                                         | 48       | -0.305   | .035     |
| <i>Pseudomonadales</i>                                           | 48       | -0.287   | .048     |
| <i>Enterobacteriaceae</i>                                        | 48       | -0.305   | .035     |
| <i>Escherichia/Shigella</i>                                      | 48       | -0.308   | .033     |
| <i>Bifidobacterium</i> -specific PCR and T-RFLP (per g of stool) |          |          |          |
| <i>Bifidobacterium</i>                                           | 48       | 0.317    | .028     |
| <i>B longum</i>                                                  | 46       | 0.355    | .016     |
| <i>B longum</i> subspecies <i>infantis</i>                       | 46       | 0.343    | .020     |

Taxa at all phylogenetic levels were compared with nutritional status (weight-for-length, length-for-age, and weight-for-age) by using the Spearman-Wilcoxon method as described in Methods using nutritional status as continuous (z score) or categorical (above and below median z score) variables. Significant correlations were found only with length-for-age (shown here). Additional positive associations of microbiota with nutritional status were seen with categorical analysis for weight-for-length with *B longum* and *B longum* subspecies *infantis* and a negative association of weight-for-age with *Clostridium*.

**SUPPLEMENTAL TABLE 11** Multiple Linear Regression Analysis to Determine Contributions of *Bifidobacterium* Abundance and Length-for-Age z Scores to Predict Thymus Size

| Variable                                                    | Coefficient | SE      | P     |
|-------------------------------------------------------------|-------------|---------|-------|
| Model $R^2 = 0.2179$ ( $P = .013$ )                         |             |         |       |
| Intercept                                                   | -0.08825    | 0.14187 | .54   |
| <i>Bifidobacterium</i> (relative abundance)                 | 0.14757     | 0.14334 | .31   |
| Length-for-age z score                                      | 0.36378     | 0.14307 | .015  |
| Interaction                                                 | 0.28661     | 0.17065 | .10   |
| Model $R^2 = 0.2505$ ( $P = .0057$ )                        |             |         |       |
| Intercept                                                   | -0.05155    | 0.13803 | .71   |
| <i>Bifidobacterium</i> (per g of stool)                     | 0.29036     | 0.14747 | .055  |
| Length-for-age z score                                      | 0.28641     | 0.13946 | .046  |
| Interaction                                                 | 0.14743     | 0.1714  | .39   |
| Model $R^2 = 0.3254$ ( $P = .001$ )                         |             |         |       |
| Intercept                                                   | -0.16047    | 0.13706 | .25   |
| <i>B longum</i> (per g of stool)                            | 0.32238     | 0.13958 | .026  |
| Length-for-age z score                                      | 0.27918     | 0.13965 | .052  |
| Interaction                                                 | 0.4242      | 0.1741  | .019  |
| Model $R^2 = 0.2951$ ( $P = .0023$ )                        |             |         |       |
| Intercept                                                   | -0.13536    | 0.1386  | .33   |
| <i>B longum</i> subspecies <i>infantis</i> (per g of stool) | 0.28432     | 0.14067 | .0498 |
| Length-for-age z score                                      | 0.28209     | 0.14183 | .053  |
| Interaction                                                 | 0.36648     | 0.17039 | .037  |

All variables transformed to normalized ranks.
